# Supplementary material for: Efficacy and safety of metabolic interventions for the treatment of severe COVID-19: in vitro, observational, and non-randomized open-label interventional study
Source: eLife. 2023 Jan 27;12:e79946. doi: 10.7554/eLife.79946 (PMC9937660; doi:10.7554/eLife.79946)
Supplement: Figure 2—source data 1. [file elife-79946-fig2-data1.xlsx]

## Sheet: Figure 2A
	Mean				SE		ttest
	Blue	Green	G/B		G/B		G/B
Control	6.7117	4.66687	0.695334	1	0.0419045	0.0852279	1
NSP6	8.45372	6.52954	0.772387	1.11081	0.0724435	0.123839	0.258966
NSP8	7.87562	4.65438	0.590985	0.84993	0.0531091	0.0919642	0.321788
ORF6	6.05707	3.94474	0.651262	0.936617	0.101207	0.156113	0.720998
ORF9c	6.52276	4.45597	0.683141	0.982464	0.15415	0.229462	0.930497
M	8.6172	6.44797	0.748267	1.07613	0.0695545	0.119214	0.370188
N	7.69407	9.42118	1.22447	1.76098	0.130312	0.215372	0.0563706
ORF3a	7.57168	10.9294	1.44346	2.07593	0.0961593	0.186484	0.000316634
NSP7	6.64122	8.19298	1.23365	1.77419	0.112365	0.193769	0.0345707
ORF8	7.14653	6.7484	0.944291	1.35804	0.0634952	0.122625	0.0324524
NSP5	8.01235	10.5773	1.32012	1.89855	0.0805339	0.162805	0.00276992
NSP12	6.8816	8.31477	1.20826	1.73767	0.0784965	0.153983	0.0257475

## Sheet: Figure 2B-C
Mean	#	Glutamate	Glutamine	Glucose	Lactate	Lac/Glu	STD	Glutamate	Glutamine	Glucose	Lactate	Lac/Glu	TTEST	Glutamate	Glutamine	Glucose	Lactate	Lac/Glu
Control	5	0.0847736	0.39296	6.81631	7.77996	1.14126	Control	0.0418341	0.0415397	0.0946919	0.287485	0.0345854	Control	1	1	1	1	1
NSP6	5	0.0711544	0.298323	6.17639	7.58642	1.23248	NSP6	0.0542719	0.0282727	0.419417	0.29646	0.0911921	NSP6	0.669259	0.00391461	0.0251988	0.325327	0.0893573
NSP8	6	0.0824754	0.300184	6.52553	7.59831	1.16561	NSP8	0.0737498	0.0402663	0.247004	0.384579	0.0708136	NSP8	0.949877	0.00508473	0.0340589	0.394197	0.480301
ORF6	5	0.0473346	0.330302	6.24442	7.29784	1.16928	ORF6	0.0582641	0.0344056	0.107691	0.269659	0.0557305	ORF6	0.28006	0.0326533	2.19768e-05	0.0257439	0.372788
ORF9c	5	0.0440292	0.3192	6.33026	7.42515	1.17382	ORF9c	0.0608134	0.0529712	0.259277	0.259734	0.0437647	ORF9c	0.256416	0.0415788	0.0107805	0.0751291	0.229998
M	5	0.068895	0.359	6.3379	7.50052	1.18356	M	0.0585733	0.0713852	0.0983853	0.3694	0.0587902	M	0.636428	0.391054	5.1168e-05	0.220793	0.211448
N	6	0.0362168	0.267743	6.15214	9.94587	1.62082	N	0.0432541	0.0521938	0.377549	0.476036	0.112237	N	0.092655	0.00165103	0.00657556	1.10741e-05	5.45531e-05
ORF3a	6	0.0622345	0.318326	6.49105	11.0748	1.7118	ORF3a	0.0523666	0.0154584	0.408102	0.611541	0.144795	ORF3a	0.447974	0.0129425	0.110467	5.01368e-06	0.000117955
NSP7	6	0.0547711	0.25758	5.60562	9.44849	1.69615	NSP7	0.0806393	0.0380934	0.639022	0.715021	0.146021	NSP7	0.451754	0.000452588	0.00523613	0.00132174	0.00014439
ORF8	6	0.0626902	0.277316	6.3443	10.0591	1.5962	ORF8	0.0909288	0.08435	0.608499	0.491992	0.150436	ORF8	0.611079	0.0195288	0.116758	9.92851e-06	0.000490053
NSP5	6	0.0264628	0.220422	5.78846	9.47984	1.63713	NSP5	0.0423304	0.0164797	0.126934	0.485293	0.058534	NSP5	0.0488343	0.00031058	1.00082e-07	7.86893e-05	8.42243e-08
NSP12	5	0.0524783	0.304181	5.82367	9.46335	1.62936	NSP12	0.0414845	0.0294429	0.34052	0.30669	0.107668	NSP12	0.25516	0.00557646	0.00200531	1.9751e-05	0.000248297

## Sheet: Figure 2D-F
Mean		Control	NSP6	NSP8	ORF6	ORF9c	M	N	ORF3a	NSP7	ORF8	NSP5	NSP12	NSP5mut	eGFP	NSP12
	Oxidative Phosphorylation	63.32	61.9511	62.2544	65.1311	64.0789	64.78	48.93	32.7089	31.6378	59.74	59.5033	61.6189	62.4789	64.3267	61.6189
	Basal	72.0978	70.5356	70.0956	75.3733	73.0778	75.1678	58.9478	41.1444	42.9989	68.9011	66.6844	69.9489	73.2022	72.7167	69.9489
	Maximal	141.599	133.26	149.227	130.657	135.749	128.196	94.6489	73.6022	92.0011	124.88	114.151	141.439	122.956	144.242	141.439
	Spare	69.5011	62.7244	79.1311	55.2833	62.6711	53.0278	35.7011	32.4578	49.0022	55.9789	47.4667	71.4902	49.7533	71.5256	71.4902
	Glycolysis	27.1139	26.1438	26.8392	26.3266	26.4363	26.3853	39.9855	47.4963	39.7121	37.372	39.0265	33.2403	25.5694	26.3998	33.2403
SE
	Oxidative Phosphorylation	4.23508	1.32189	3.32589	2.92928	2.2491	1.23244	2.35502	2.43615	1.50153	7.4791	3.6677	1.22734	1.96354	4.94894	1.22734
	Basal	6.1921	0.837404	5.63647	2.18049	2.70767	2.77277	5.24568	4.69045	4.6161	8.87147	4.69945	0.683272	1.56402	6.64315	0.683272
	Maximal	5.13736	9.44453	22.1685	21.9353	15.4907	17.5768	23.1173	10.1044	8.95166	16.4382	9.45742	5.75701	18.0682	24.8584	5.75701
	Spare	10.7754	8.75157	16.7167	20.6114	16.3982	19.4645	17.8889	12.5831	5.81517	8.23515	4.81148	5.11989	19.5605	19.6205	5.11989
	Glycolysis	0.369387	0.674064	0.371509	0.126275	1.57758	1.00666	4.0715	0.13934	4.07814	5.94332	3.89508	1.49189	0.3864	0.32811	1.49189
ttest
	Oxidative Phosphorylation	1	0.773069	0.85279	0.742801	0.881921	0.757252	0.0411619	0.00331122	0.00213343	0.698406	0.533114	0.719287	0.86577	0.884663	0.719287
	Basal	1	0.81489	0.822765	0.644002	0.891717	0.674366	0.180466	0.0163369	0.0196445	0.782334	0.524534	0.747511	0.871103	0.948938	0.747511
	Maximal	1	0.48128	0.754317	0.652586	0.738125	0.504784	0.118452	0.00388582	0.00861364	0.386633	0.063287	0.984471	0.377137	0.922075	0.984471
	Spare	1	0.650978	0.653563	0.574033	0.745324	0.50014	0.180867	0.0890104	0.169416	0.375161	0.13527	0.875669	0.426497	0.932286	0.875669
	Glycolysis	1	0.275489	0.627736	0.113914	0.697246	0.534102	0.0345655	8.42423e-07	0.037054	0.160051	0.0382262	0.0163179	0.0445909	0.221886	0.0163179

## Sheet: Figure 2G
Treatment	Sample	Mean	Basal	Ox-Phos	OP Inhibition	Spare Capacity	FA Oxidation	SE	Basal	Ox-Phos	OP Inhibition	Spare Capacity	FA Oxidation
Media	Control		92.0409	82.3942	-12.3416	48.5213	53.6189		1.40598	2.12431	3.99971	12.028	13.1816
Eto	Control		95.3965	84.1041	-13.9686	-5.09766			1.2397	3.12384	3.5796	5.39265
Media	ORF8		81.1151	73.1223	-4.6607	44.2602	48.7758		0.163343	0.577035	3.07843	7.86839	9.93758
Eto	ORF8		85.8242	73.4299	-14.8955	-4.51563			0.0603085	0.812032	2.34637	6.06992
Media	N		71.7434	64.1507	-4.40053	34.864	35.891		0.329047	0.677198	2.30701	4.68798	18.8481
Eto	N		68.5354	61.1589	-27.0209	-1.02699			0.731899	1.3823	11.1737	18.2558
Media	NSP7		78.1544	69.3427	-2.33111	31.5668	27.3516		0.157423	1.01558	4.57099	15.5693	17.416
Eto	NSP7		81.7439	73.1303	-31.7717	4.21516			0.275672	0.0694568	19.8783	7.80474
Media	NSP5		74.6392	65.4944	-10.72	42.5973	43.1825		0.336389	2.16392	4.68184	19.5589	26.363
Eto	NSP5		76.1981	64.963	-36.6996	-0.585233			5.89064	6.32831	14.6541	17.6765
Media	NSP12		128.548	107.956	-12.3985	39.1883	35.2197		26.7143	18.0025	6.48316	9.18993	9.66318
Eto	NSP12		118.021	104.062	-18.4403	3.9686			7.30608	6.67305	6.60109	2.987
Media	NSP8		69.6128	62.3201	-6.36023	36.218	54.6158		0.347946	0.588572	2.29382	3.56707	5.96313
Eto	NSP8		63.5682	53.384	-13.7313	-18.3978			0.803849	1.20339	4.17033	4.77859
Media	ORF9c		88.9827	77.0415	-12.7146	28.0662	29.8894		0.36256	2.57425	3.83183	9.7521	18.6825
Eto	ORF9c		94.63	80.6911	-28.0331	-1.8232			2.26169	16.987	17.123	15.9352
Media	ORF3a		61.8482	56.7529	0.557927	37.6461	41.8802		3.14972	2.38076	1.73357	2.64202	8.0251
Eto	ORF3a		49.783	41.0276	-9.36651	-4.23411			5.55475	6.02769	3.61604	7.57773
Media	ORF6		86.1784	79.2225	-9.50359	70.8777	50.5161		2.0413	2.78584	3.70047	6.37238	22.1926
Eto	ORF6		88.3338	77.9444	-17.9122	20.3615			0.213784	2.73335	2.20322	21.258
Media	M		79.9015	71.9915	-11.0012	33.3843	46.0946		0.345792	0.936257	0.533437	4.91197	5.73005
Eto	M		83.6711	74.6797	-14.6693	-12.7103			0.541972	0.679348	1.40485	2.95059
Media	NSP6		77.3104	69.019	-3.93194	49.1534	68.1718		0.159159	1.72938	4.47236	24.1854	24.6689
Eto	NSP6		79.9659	72.0637	-18.0048	-19.0183			0.629141	3.64151	3.94103	4.86032

## Sheet: Figure 2H
							Normalized
	Average of Green per Cell	Average of Red per Cell	Count of Green per Cell	Count of Red per Cell	StdDev of Green per Cell	StdDev of Red per Cell	Average of Green per Cell	Average of Red per Cell	SE of Green per Cell	SE of Red per Cell	ttest of Green per Cell	ttest of Red per Cell
Control	0.969213	0.31918	32	32	0.531546	0.265448	1	1	0.158318	0.240078
NSP6	1.4759	0.353015	32	32	0.596817	0.239193	1.52278	1.10601	0.251389	0.30594	0.0854	0.2074
NSP8	1.34231	0.330123	32	32	0.468072	0.254278	1.38494	1.03428	0.197159	0.325236	0.1648	0.6817
ORF6	1.33456	0.336631	32	32	0.490457	0.247402	1.37695	1.05467	0.206588	0.31644	0.1783	0.5116
ORF9c	1.45907	1.15399	32	32	0.619785	0.129251	1.50541	3.61548	0.261063	0.165319	0.0997	0.0001
M	1.54993	1.23995	32	32	0.474119	0.1312	1.59916	3.88479	0.199706	0.167812	0.0382	0.0001
N	0.994135	0.867566	32	32	0.554932	0.101227	1.02571	2.71811	0.233746	0.129474	0.9275	0.0001
ORF3a	1.42739	1.20758	32	32	0.534428	0.129578	1.47274	3.78337	0.22511	0.165738	0.1045	0.0001
NSP7	1.49861	1.48506	32	32	0.717978	0.273412	1.54622	4.65272	0.302424	0.349709	0.0947	0.0001
ORF8	1.0864	0.773458	32	32	0.48941	0.174238	1.12091	2.42326	0.206147	0.222859	0.6575	0.0001
NSP5	1.58085	0.855441	32	32	0.752471	0.099349	1.63106	2.68012	0.316953	0.127073	0.0619	0.0001
NSP12	1.36982	1.44279	32	32	0.559524	0.253438	1.41333	4.5203	0.23568	0.32416	0.1576	0.0001
