# Supplementary material for: Efficacy and safety of metabolic interventions for the treatment of severe COVID-19: in vitro, observational, and non-randomized open-label interventional study
Source: eLife. 2023 Jan 27;12:e79946. doi: 10.7554/eLife.79946 (PMC9937660; doi:10.7554/eLife.79946)
Supplement: Figure 3—source data 1. [file elife-79946-fig3-data1.xlsx]

## Sheet: Fig 2B
	Mean (5 Fields)		Mean (Biolgical)		SE		pval
Label	green per cell	red per cell	Neutral Lipid	Phospholipid	Neutral Lipid	Phospholipid
COV2 Cloperastine Lipid b-48_c2	9.528	7.042	4.78114	7.95843	1.30354	0.681988	0.0175311
COV2 Cloperastine Lipid c-49_c2	7.856	5.487
COV2 Cloperastine Lipid d-50_c2	1.762	8.922
COV2 Cloperastine Lipid e-51_c2	1.725	8.591
COV2 Cloperastine Lipid f-52_c2	2.137	8.61
COV2 Cloperastine Lipid g-53_c2	2.629	10.785
COV2 Cloperastine Lipid-54_c2	7.831	6.272
COV2 Empagliflozin Lipid b-55_c2	6.818	5.669	5.20757	6.05857	1.15939	0.220255	0.747735
COV2 Empagliflozin Lipid c-01_c2	7.469	5.999
COV2 Empagliflozin Lipid d-02_c2	7.107	5.731
COV2 Empagliflozin Lipid e-03_c2	0.549	7.294
COV2 Empagliflozin Lipid f-04_c2	6.432	6.066
COV2 Empagliflozin Lipid g-05_c2	7.138	5.561
COV2 Empagliflozin Lipid-06_c2	0.94	6.09
COV2 Fenofibrate Lipid b-07_c2	1.925	3.442	5.01337	3.96488	1.01405	0.358216	0.000360326
COV2 Fenofibrate Lipid c-08_c2	3.537	5.635
COV2 Fenofibrate Lipid d-09_c2	1.446	2.595
COV2 Fenofibrate Lipid e-10_c2	2.767	3.263
COV2 Fenofibrate Lipid f-11_c2	8.267	4.866
COV2 Fenofibrate Lipid g-12_c2	6.898	3.714
COV2 Fenofibrate Lipid h-13_c2	7.97	4.486
COV2 Fenofibrate Lipid-14_c2	7.297	3.718
COV2 GW9662 Lipid b-15_c2	6.323	5.675	3.8005	4.57488	1.09443	0.596526	0.102153
COV2 GW9662 Lipid c-16_c2	6.843	6.027
COV2 GW9662 Lipid d-17_c2	6.595	5.801
COV2 GW9662 Lipid e-18_c2	6.983	3.443
COV2 GW9662 Lipid f-19_c2	0.921	2.542
COV2 GW9662 Lipid g-20_c2	1.03	2.349
COV2 GW9662 Lipid h-21_c2	1.165	3.585
COV2 GW9662 Lipid-22_c2	0.544	7.177
COV2 Metformin Lipid b-26_c2	6.349	6.311	5.27863	8.74925	0.85741	1.17817	0.0422746
COV2 Metformin Lipid c-27_c2	6.184	6.31
COV2 Metformin Lipid d-28_c2	7.251	7.765
COV2 Metformin Lipid e-29_c2	6.469	7.361
COV2 Metformin Lipid f-30_c2	6.149	6.314
COV2 Metformin Lipid g-31_c2	1.89	16.616
COV2 Metformin Lipid h-32_c2	0.95	11.694
COV2 Metformin Lipid-33_c2	6.987	7.623
COV2 Rosiglitazone Lipid b-34_c2	7.271	5.865	5.0765	6.14162	1.07994	0.421643	0.683522
COV2 Rosiglitazone Lipid c-35_c2	6.633	5.186
COV2 Rosiglitazone Lipid d-36_c2	6.86	4.937
COV2 Rosiglitazone Lipid e-37_c2	6.953	5.068
COV2 Rosiglitazone Lipid f-38_c2	1.006	5.848
COV2 Rosiglitazone Lipid g-39_c2	1.926	8.301
COV2 Rosiglitazone Lipid h-40_c2	1.456	7.707
COV2 Rosiglitazone Lipid-41_c2	8.507	6.221
COV2 Vehicle Lipid b-42_c2	2.768	7.642	3.15722	5.88656	0.726798	0.426875	1
COV2 Vehicle Lipid c-43_c2	1.541	6.348
COV2 Vehicle Lipid d-44_c2	1.971	6.256
COV2 Vehicle Lipid e-45_c2	7.027	4.783
COV2 Vehicle Lipid f-46_c2	6.782	4.586
COV2 Vehicle Lipid-47_c2	2.287	7.87
COV2 Lipid b-23_c2	1.714	4.345
COV2 Lipid c-24_c2	2.844	5.204
COV2 Lipid-25_c2	1.481	5.945
mock Lipid b-12_c2	1.875	2.18325	2.24325	3.04446	0.187349	0.199183	7.99853e-05
mock Lipid c-13_c2	2.9515	3.1885
mock Lipid d-14_c2		2.63575
mock Lipid e-15_c2	2.68725	3.15275
mock Lipid f-16_c2	2.02325	3.71325
mock Lipid g-17_c2	1.8865	2.8895
mock Lipid h-18_c2	2.036	3.54825

## Sheet: Fig 2C
Sample	Lactate (mmol/L)	Glucose (mg/dL)	Glucose Uptake (mM)	Lactate Production (mM)	Lactate / Glucose Ratio	pval
DMSO(Vehical) 1-3	3.3	55	1.66522	3.3	1.68146
DMSO(Vehical) 3-2	4	27	3.21943	4	1.08715			Mean			SE
DMSO(Vehical) 3-3	4.1	28	3.16392	4.1	1.13783			Glucose Uptake (mM)	Lactate Production (mM)	Lactate / Glucose Ratio	Glucose Uptake (mM)	Lactate Production (mM)	Lactate / Glucose Ratio
Fenofibrate 1-2	2.6	30	3.05291	2.6	0.687868		Vehicle	2.68286	3.8	1.30214	0.509071	0.251661	0.190219
Fenofibrate 1-3	2.2	26	3.27494	2.2	0.519094	0.0703833	Fenofibrate	3.16392	2.4	0.603481	0.111015	0.484195	0.142294
Rosaglitazone 1-1	5.2	42	2.38682	5.2	1.96915		Rosiglitazone	3.01961	4.58	1.39689	0.304331	0.578312	0.184659
Rosaglitazone 1-3	3.6	35	2.77537	3.6	1.11697		Cloperastine	2.49784	3.5	1.19401	0.13784	0.940449	0.457822
Rosaglitazone 2-1	5	38	2.60885	5	1.7249		Empagliglozin	2.78647	3.94	1.2764	0.327165	0.866667	0.420735
Rosaglitazone 2-2	5.6	11	4.10755	5.6	1.24162		Metformin	3.40446	4.83333	1.27171	0.0979059	0.503322	0.25336
Rosaglitazone 2-3	3.5	27	3.21943	3.5	0.931841	0.757996	Mock	2.86974	3.1	1.0014	0.200827	0.318329	0.0975594	* See Figure 1 Source data
Cloperastine 1-1	1.9	43	2.33131	1.9	0.60052		GW9662	3.42758	4.4	1.18508	0.371233	0.592546	0.185394
Cloperastine 2-1	3.7	45	2.2203	3.7	1.44125
Cloperastine 2-2	3.9	34	2.83088	3.9	1.20104
Cloperastine 2-3	4.5	38	2.60885	4.5	1.53324	0.728898
Empagliflozin 1-2	4.4	32	2.94189	4.4	1.32568
Empagliflozin 1-3	2.9	57	1.55421	2.9	1.54419
Empagliflozin 2-1	4.1	24	3.38595	4.1	1.06322
Empagliflozin 2-2	4.5	35	2.77537	4.5	1.44125
Empagliflozin 2-3	3.8	26	3.27494	3.8	1.00765	0.900232
Metformin 2-1	4.5	23	3.44146	4.5	1.1623
Metformin 2-2	5.4	21	3.55248	5.4	1.37932
Metformin 2-3	4.6	27	3.21943	4.6	1.27352	0.886577
GW9662 1-1	4.2	39	2.55334	4.2	1.44908
GW9662 2-1	4.2	7	4.32958	4.2	0.854586
GW9662 2-2	5.4	27	3.21943	5.4	1.52201
GW9662 2-3	3.8	20	3.60798	3.8	0.914638	0.672227
Fresh media = glucose 85mg/dL

## Sheet: Fig 2D
		Viral Load (Copies/mL)
D1	Fenofibrate	1.3266e+08	1.30681e+08	1.39475e+08	1.74747e+08	1.41587e+08	1.6048e+08						Mean	SE	pval
		2.17844e+08	2.38402e+08	2.24491e+08	2.27891e+08	2.51909e+08	2.45677e+08				Fenofibrate	1	2.67076e+08	5.13255e+07	0.265838
		4.01416e+08	4.05458e+08	4.05458e+08	4.71217e+08	4.2843e+08	4.09541e+08					3	1.01674e+06	231502	0.0202397
	Vehicle	4.05458e+08	2.59596e+08	2.57008e+08	2.72933e+08	7.03535e+08	3.45398e+08					5	243140	26855.5	8.74115e-10
		2.5065e+08	2.58299e+08	2.609e+08	2.95713e+08	3.9941e+08	2.78458e+08				Vehicle	1	3.20489e+08	2.6274e+07	1
		2.68862e+08	2.81262e+08	2.77067e+08	2.9869e+08	3.3517e+08	3.20393e+08					3	1.6602e+07	8.44321e+06	1
	Cloperastine	2.57008e+08	2.71569e+08	2.67518e+08	2.74304e+08	2.85522e+08	3.06267e+08					5	1.9153e+07	661764	1
		2.09285e+08	2.40803e+08	2.2337e+08	2.609e+08	2.97198e+08	2.36025e+08				Cloperastine	1	2.59466e+08	9.03823e+06	0.0339824
		2.32504e+08	2.48151e+08	2.53174e+08	2.67518e+08	2.77067e+08	2.62211e+08					3	3.38636e+07	2.07516e+06	0.0339269
	Rosiglitazone	2.68862e+08	2.88397e+08	2.67518e+08	2.85522e+08	3.07805e+08	2.78458e+08					5	6.74503e+06	991135	0.00102722
		2.01063e+08	2.15672e+08	2.11393e+08	2.49397e+08	2.14594e+08	2.21143e+08				Rosiglitazone	1	2.66467e+08	1.59771e+07	0.104929
		2.74304e+08	2.78458e+08	3.01698e+08	3.38545e+08	3.10905e+08	2.82675e+08					3	2.36648e+07	3.94141e+06	0.102252
	Empaglifizone	1.95109e+08	1.97074e+08	2.03088e+08	2.13522e+08	2.22253e+08	2.12454e+08					5	1.07059e+07	4.94348e+06	0.0891329
		1.99058e+08	2.15672e+08	2.06163e+08	2.21143e+08	1.99058e+08	2.09285e+08				Empaglifizone	1	2.3659e+08	1.84017e+07	0.016275
		2.72933e+08	2.82675e+08	3.09351e+08	3.12467e+08	2.84095e+08	3.03214e+08					3	2.79633e+07	6.10973e+06	0.0983931
	GW9662	2.24491e+08	2.22253e+08	2.09285e+08	2.15672e+08	2.03088e+08	2.70212e+08					5	1.0352e+07	2.80686e+06	0.0911431
		2.16755e+08	2.32504e+08	2.30186e+08	2.25619e+08	2.13522e+08	2.17844e+08				GW9662	1	2.25384e+08	2.24607e+06	0.000612589
		2.24491e+08	2.5065e+08	2.21143e+08	2.31342e+08	2.2337e+08	2.24491e+08					3	1.02836e+07	3.46364e+06	0.782368
	Metformin	2.33672e+08	2.32504e+08	2.34845e+08	2.34845e+08	2.26752e+08	2.31342e+08					5	7.79778e+06	4.14177e+06	0.0730578
		2.64851e+08	2.63527e+08	2.72933e+08	2.77067e+08	3.01698e+08	2.68862e+08				Metformin	1	2.45951e+08	9.36546e+06	0.0103195
		2.30186e+08	2.22253e+08	2.34845e+08	2.39599e+08	2.18938e+08	2.38402e+08					3	2.21749e+07	5.95788e+06	0.276722
D3	Fenofibrate	143583	355570	323285	578069	249140	289546					5	9.56319e+06	965663	0.000859129
		1.12555e+06	1.3279e+06	1.10321e+06	1.71448e+06	1.62255e+06	1.31466e+06
		1.14259e+06	1.05457e+06	1.23176e+06	1.60637e+06	1.82986e+06	1.28858e+06
	Vehicle	5.42712e+06	5.2664e+06	4.83643e+06	6.79956e+06	5.16192e+06	5.67742e+06
		796584	1.23176e+06	1.00808e+06	1.23795e+06	1.21339e+06	1.14259e+06
		4.27568e+07	4.1699e+07	4.31874e+07	4.60938e+07	4.27568e+07	4.25431e+07
	Cloperastine	3.10279e+07	3.07186e+07	2.93642e+07	3.37864e+07	3.19748e+07	2.93642e+07
		3.82946e+07	4.21189e+07	3.88745e+07	4.0262e+07	4.1077e+07	4.12833e+07
		2.80696e+07	2.77898e+07	3.1815e+07	3.11838e+07	3.19748e+07	3.05651e+07
	Rosiglitazone	3.60601e+07	3.58799e+07	3.55222e+07	3.49923e+07	3.46434e+07	3.77233e+07
		1.53096e+07	1.53865e+07	1.54637e+07	1.42012e+07	1.51569e+07	1.54637e+07
		1.93743e+07	2.06782e+07	1.89899e+07	2.08864e+07	1.98658e+07	2.03697e+07
	Empaglifizone	3.01091e+07	2.86378e+07	2.90715e+07	3.04123e+07	2.98089e+07	2.79293e+07
		1.0567e+07	1.11657e+07	1.01011e+07	9.80201e+06	1.04617e+07	1.14489e+07
		4.49535e+07	4.31874e+07	4.31874e+07	4.60938e+07	4.42829e+07	4.21189e+07
	GW9662	4.64642e+06	4.2885e+06	4.44157e+06	4.57711e+06	4.50883e+06	4.4863e+06
		4.6001e+06	5.08491e+06	4.66976e+06	5.62082e+06	5.88006e+06	5.00906e+06
		2.13092e+07	2.21806e+07	2.19595e+07	2.01666e+07	2.12027e+07	2.0472e+07
	Metformin	3.32824e+07	3.53447e+07	3.53447e+07	4.1077e+07	3.41266e+07	3.73472e+07
		3.93837e+06	4.31004e+06	4.12002e+06	4.35345e+06	4.53148e+06	4.33169e+06
		2.71023e+07	2.61683e+07	2.59074e+07	2.65646e+07	2.55209e+07	2.57779e+07
D5	Fenofibrate	174566	N/A	N/A	N/A	289546	269933
		109549	219810	N/A	578069	173694	74485.4
		172826	497399	331485	355570	225386	110652
	Vehicle	N/A	N/A	N/A	N/A	N/A	N/A
		1.77925e+07	1.57768e+07	1.83355e+07	1.87066e+07	1.95694e+07	1.92775e+07
		1.94716e+07	1.94716e+07	2.03697e+07	2.15238e+07	2.01666e+07	1.93743e+07
	Cloperastine	3.87962e+06	3.49219e+06	3.01994e+06	3.52735e+06	3.89911e+06	3.93837e+06
		8.022e+06	8.06229e+06	8.10278e+06	9.27644e+06	7.04225e+06	8.18438e+06
		8.95675e+06	8.14348e+06	9.00174e+06	8.56186e+06	8.4765e+06	7.82354e+06
	Rosiglitazone	2.47652e+07	2.60375e+07	2.60375e+07	2.76509e+07	2.64318e+07	2.68321e+07
		3.08107e+06	3.44009e+06	3.65325e+06	4.88514e+06	4.05856e+06	3.61683e+06
		2.10543e+06	2.32732e+06	1.58241e+06	2.45918e+06	1.99254e+06	1.74918e+06
	Empaglifizone	1.72656e+07	1.65873e+07	1.79717e+07	1.92775e+07	1.81527e+07	1.79717e+07
		2.18057e+06	2.41039e+06	2.28115e+06	2.81538e+06	2.91587e+06	2.63786e+06
		1.03574e+07	1.00004e+07	1.0567e+07	1.09442e+07	1.11099e+07	1.08895e+07
	GW9662	2.00658e+07	1.99655e+07	1.83355e+07	2.21806e+07	2.30876e+07	2.10967e+07
		N/A	2.22471e+06	2.13731e+06	2.61156e+06	N/A	2.5726e+06
		214372	229948	N/A	175443	252912	N/A
	Metformin	1.16807e+07	1.16223e+07	1.19171e+07	1.21584e+07	1.15064e+07	1.1977e+07
		9.55952e+06	1.0727e+07	9.60754e+06	1.0727e+07	1.0567e+07	1.01011e+07
		6.83371e+06	5.9096e+06	6.63135e+06	7.07762e+06	6.90253e+06	6.63135e+06

## Sheet: Fig 2E
	Mean cell number	SE	pval	relative cell number	SE
GW9662	5410	2361	0.04337	0.412159	0.436414
Metformin	10724.5	1225.5	0.109781	0.817043	0.226525
Empaglifizone	12556.8	383.833	0.251962	0.956638	0.0709489
Cloperastine	14852.2	2148.5	0.259786	1.13151	0.397135
Rosiglitazone	11733	2353.33	0.311926	0.893875	0.434997
Fenofibrate	12434	2748.33	0.414256	0.94728	0.50801
Vehicle	13126	590.667		1	0.109181

## Sheet: Fig 2F,H(WT)
Type	Natural Lipid	Phospholipids		Row Labels	Natural Lipid	SE	Phospholipids	SE	Relative cell number	SE
9CLA	0.0989011	0.579976		Fenofibrate+Etomoxir	0.236777	0.021767	1.14389	0.0724284	0.629413	0.0420885
9CLA	0.105948	0.576828		9CLA	0.0651634	0.0035159	0.789102	0.0608619	1	0.0499762
9CLA	0.0975155	0.740994		WY-14643	0.0775372	0.00328513	0.694193	0.0588328	1.12391	0.0598484
9CLA	0.0969499	1.31046		Bezafibrate	0.105578	0.00871913	0.861289	0.048131	1.02528	0.0547417
9CLA	0.0923077	1.61282		Fenofibrate	0.0721019	0.00306379	0.707473	0.0367171	1.1317	0.0433606
9CLA	0.0655509	1.23431		Vehicle	0.313339	0.0196143	1.15354	0.107576	1	0.0499762
9CLA	0.0846939	1.04184
9CLA	0.114802	0.759907
9CLA	0.0862876	0.742475
9CLA	0.101802	0.497748
9CLA	0.0530554	0.442918
9CLA	0.0714286	0.901697
9CLA	0.0776583	0.526882
9CLA	0.0614035	0.701023
9CLA	0.0413793	1.28
9CLA	0.0528914	0.869535
9CLA	0.0617284	0.512614
9CLA	0.0535302	0.378865
9CLA	0.0831169	0.637922
9CLA	0.0581717	0.636011
9CLA	0.083004	0.41581
9CLA	0.0444851	0.37599
9CLA	0.0538682	0.320917
9CLA	0.052677	0.53152
9CLA	0.0383858	0.99311
9CLA	0.0553571	0.697619
9CLA	0.0868887	0.69667
9CLA	0.0500284	0.564525
9CLA	0.0704225	0.561368
9CLA	0.0301932	0.620169
9CLA	0.0644599	0.711382
9CLA	0.0523962	0.732268
9CLA	0.0494166	0.873713
9CLA	0.0574061	0.804394
9CLA	0.0487805	2.28537
9CLA	0.036157	1.01653
9CLA	0.0349563	1.44195
9CLA	0.0486163	0.489155
9CLA	0.0384314	0.829804
9CLA	0.0514821	0.617005
BF	0.174939	0.713075
BF	0.190981	0.549514
BF	0.0914928	0.727929
BF	0.127554	0.671452
BF	0.0841969	1.16321
BF	0.102151	0.795699
BF	0.0835857	0.784373
BF	0.108583	0.367632
BF	0.143622	0.37868
BF	0.115479	1.27764
BF	0.184783	1.31793
BF	0.170681	1.22932
BF	0.149254	1.27313
BF	0.154073	0.866536
BF	0.16	1.08588
BF	0.166028	0.771392
BF	0.0751945	1.01988
BF	0.106972	0.974212
BF	0.0610961	1.0575
BF	0.0868347	0.980392
BF	0.10643	0.971175
BF	0.114693	0.748915
BF	0.0593838	0.667227
BF	0.0487654	0.696296
BF	0.0322581	1.01365
BF	0.0372787	1.00093
BF	0.0491659	1.00527
BF	0.0907903	0.563031
BF	0.0381426	0.709784
BF	0.0529412	0.457014
Control	0.413655	0.707497
Control	0.449842	0.803785
Control	0.185084	0.322983
Control	0.584296	1.2067
Control	0.533654	2.10096
Control	0.194444	1.9375
Control	0.595986	1.09948
Control	0.535645	1.37187
Control	0.443677	0.856945
Control	0.344636	0.813765
Control	0.217529	0.785639
Control	0.282225	0.871622
Control	0.235326	1.00713
Control	0.362648	1.06917
Control	0.4	2.86462
Control	0.191538	1.00538
Control	0.281768	1.04025
Control	0.211758	0.814371
Control	0.203684	0.946316
Control	0.193906	1.03047
Control	0.194746	0.611079
Control	0.266125	0.757724
Control	0.236599	0.747381
Control	0.246908	0.965644
Control	0.554348	2.75
Control	0.228995	1.23147
Control	0.238117	0.846692
Control	0.202915	0.851312
Control	0.217979	0.853114
Control	0.186196	0.869181
Control	0.254649	1.00906
Control	0.291711	0.798087
Control	0.377273	1.02078
Control	0.299245	0.980782
Control	0.428571	3.95408
Control	0.222564	1.38769
Control	0.451587	1.21155
Control	0.264315	0.95373
Control	0.257865	0.878652
Control	0.251557	0.806974
FF	0.0754141	0.455972
FF	0.0678864	0.623014
FF	0.108286	0.634809
FF	0.0867945	0.775825
FF	0.0559345	1.38608
FF	0.067696	0.812945
FF	0.0694006	0.82571
FF	0.0775764	0.754247
FF	0.0978887	0.722969
FF	0.0715564	0.461538
FF	0.114545	0.505455
FF	0.116057	0.6354
FF	0.0526316	0.559666
FF	0.0768374	0.707127
FF	0.0786416	0.950849
FF	0.110358	0.691122
FF	0.0752803	0.584624
FF	0.076661	0.52243
FF	0.073371	0.626475
FF	0.0796601	0.592671
FF	0.0653595	0.470588
FF	0.0537634	0.591935
FF	0.0691489	0.821809
FF	0.0552666	0.763979
FF	0.0607083	0.471613
FF	0.0748007	0.746168
FF	0.0811629	0.646881
FF	0.0737393	0.497621
FF	0.0745383	0.692612
FF	0.0425631	0.511225
FF	0.0596697	0.720831
FF	0.0596222	0.786305
FF	0.04266	1.30991
FF	0.0570265	1.26884
FF	0.0542965	0.511804
FF	0.0458128	0.693103
FF	0.0651542	0.84235
FF+ETO	0.397086	0.904372
FF+ETO	0.315747	0.668019
FF+ETO	0.347052	0.798665
FF+ETO	0.342327	0.761664
FF+ETO	0.484472	2.01242
FF+ETO	0.35732	0.810587
FF+ETO	0.28553	0.498062
FF+ETO	0.344519	1.10291
FF+ETO	0.276991	0.767257
FF+ETO	0.318452	0.675
FF+ETO	0.0423412	0.977584
FF+ETO	0.0394633	0.786898
FF+ETO	0.0478548	1.10066
FF+ETO	0.0580475	1.51847
FF+ETO	0.0304183	1.92395
FF+ETO	0.0168244	1.47634
FF+ETO	0.060251	1.06778
FF+ETO	0.0510345	0.864828
FF+ETO	0.0535876	0.881017
FF+ETO	0.0439716	0.656028
FF+ETO	0.0517241	1.11782
FF+ETO	0.0432099	0.918519
FF+ETO	0.0538525	0.91715
FF+ETO	0.0696118	1.44578
FF+ETO	0.0372671	2.08696
FF+ETO	0.031746	1.52249
FF+ETO	0.0802469	1.4892
FF+ETO	0.0490956	0.851852
FF+ETO	0.0538462	1.04444
FF+ETO	0.0971074	1.63223
FF+ETO	0.0243902	0.937763
FF+ETO	0.0250965	1.00386
FF+ETO	0.0230627	0.99262
FF+ETO	0.0306818	1.10455
FF+ETO	0.0232558	2.61628
FF+ETO	0.0133333	1.68444
FF+ETO	0.0392638	1.50552
FF+ETO	0.0290179	0.956473
FF+ETO	0.0253283	0.865854
FF+ETO	0.0211039	0.809253
WY	0.101006	0.486664
WY	0.133501	0.4089
WY	0.0746812	0.579235
WY	0.0660377	0.607966
WY	0.0384968	0.871677
WY	0.0557377	0.804098
WY	0.0532044	0.464329
WY	0.102429	0.56547
WY	0.0943497	0.467484
WY	0.10432	0.482613
WY	0.0886652	0.351413
WY	0.110709	0.389653
WY	0.0595295	0.575132
WY	0.0721966	0.559652
WY	0.0637119	1.34488
WY	0.0636725	0.58158
WY	0.0606641	0.652618
WY	0.0674157	0.592295
WY	0.0757856	0.374307
WY	0.10681	0.501399
WY	0.11273	0.354294
WY	0.0931315	0.388436
WY	0.0895288	0.575393
WY	0.0753941	0.962303
WY	0.0837104	2.28054
WY	0.0875421	0.676768
WY	0.0724495	0.313948
WY	0.0668302	0.659718
WY	0.0720867	0.532791
WY	0.0678808	0.594923
WY	0.0889632	0.767893
WY	0.0837004	0.724355
WY	0.0599848	0.997722
WY	0.0768421	1.32105
WY	0.032316	1.46499
WY	0.0587234	0.813617
WY	0.0798845	0.900866
WY	0.0518617	0.558511
WY	0.0807726	0.761194
WY	0.0742331	0.457055

## Sheet: Fig 2F,H(Delta)
Type	Natural Lipid	Phospholipids		Row Labels	Natural Lipid	SE	Phospholipids	SE	Relative cell number	SE
Bezafibrate	0.0574067	0.418306		Fenofibrate+Etomoxir	0.236777	0.021767	1.14389	0.0724284	0.629413	0.0420885
Bezafibrate	0.0506329	0.332731		9CLA	0.0651634	0.0035159	0.789102	0.0608619	1	0.0499762
Bezafibrate	0.0597947	0.540384		WY-14643	0.0775372	0.00328513	0.694193	0.0588328	1.12391	0.0598484
Bezafibrate	0.086494	0.351989		Bezafibrate	0.105578	0.00871913	0.861289	0.048131	1.02528	0.0547417
Bezafibrate	0.0661376	0.690476		Fenofibrate	0.0721019	0.00306379	0.707473	0.0367171	1.1317	0.0433606
Bezafibrate	0.0473644	0.549274		Vehicle	0.313339	0.0196143	1.15354	0.107576	1	0.0499762
Bezafibrate	0.0681253	0.549975
Bezafibrate	0.0525093	0.410781
Bezafibrate	0.0484466	0.413375
Bezafibrate	0.0488053	0.512456
Bezafibrate	0.089916	0.494538
Bezafibrate	0.0666667	0.373434
Bezafibrate	0.0486322	0.530395
Bezafibrate	0.0482514	0.276671
Bezafibrate	0.0696517	0.742004
Bezafibrate	0.0666667	1.13257
Bezafibrate	0.0436064	0.394225
Bezafibrate	0.042292	0.466576
Bezafibrate	0.0550045	0.367448
Bezafibrate	0.0661964	0.347802
Bezafibrate	0.0477137	0.408052
Bezafibrate	0.0466531	0.34787
Bezafibrate	0.0610368	0.290552
Bezafibrate	0.0487484	0.463109
Bezafibrate	0.054615	0.743856
Bezafibrate	0.0668139	0.617338
Bezafibrate	0.0498474	0.491353
Bezafibrate	0.0506555	0.490465
Bezafibrate	0.0462345	0.358913
Bezafibrate	0.0472404	0.397568
Bezafibrate	0.0657277	0.459624
Bezafibrate	0.0572707	0.291723
Bezafibrate	0.0447248	0.330275
Bezafibrate	0.0605023	0.334475
Bezafibrate	0.0541436	0.78453
Bezafibrate	0.0529519	0.573341
Bezafibrate	0.0527567	0.626901
Bezafibrate	0.0620816	0.477176
Bezafibrate	0.0650371	0.43911
Bezafibrate	0.0469858	0.452128
Conjugated Linoleic Acid	0.108705	0.55751
Conjugated Linoleic Acid	0.150255	0.539049
Conjugated Linoleic Acid	0.114692	0.682464
Conjugated Linoleic Acid	0.156136	0.681045
Conjugated Linoleic Acid	0.14715	1.21865
Conjugated Linoleic Acid	0.0630942	0.831461
Conjugated Linoleic Acid	0.167524	0.662093
Conjugated Linoleic Acid	0.110883	0.841205
Conjugated Linoleic Acid	0.148737	0.74275
Conjugated Linoleic Acid	0.149396	0.810553
Conjugated Linoleic Acid	0.110138	0.548185
Conjugated Linoleic Acid	0.153017	0.554957
Conjugated Linoleic Acid	0.169215	0.626402
Conjugated Linoleic Acid	0.166667	0.760843
Conjugated Linoleic Acid	0.127242	1.18787
Conjugated Linoleic Acid	0.0819277	1.11084
Conjugated Linoleic Acid	0.236	0.790667
Conjugated Linoleic Acid	0.160424	0.885144
Conjugated Linoleic Acid	0.16209	0.83791
Conjugated Linoleic Acid	0.126967	0.668416
Conjugated Linoleic Acid	0.18515	0.510808
Conjugated Linoleic Acid	0.141138	0.481947
Conjugated Linoleic Acid	0.201563	0.725521
Conjugated Linoleic Acid	0.188694	0.679144
Conjugated Linoleic Acid	0.166935	0.824194
Conjugated Linoleic Acid	0.117763	1.40922
Conjugated Linoleic Acid	0.232784	0.941617
Conjugated Linoleic Acid	0.24026	0.776438
Conjugated Linoleic Acid	0.144745	0.736937
Conjugated Linoleic Acid	0.153846	0.733603
Conjugated Linoleic Acid	0.218705	0.619185
Conjugated Linoleic Acid	0.154399	0.522843
Conjugated Linoleic Acid	0.192286	0.584341
Conjugated Linoleic Acid	0.199694	0.72593
Conjugated Linoleic Acid	0.150228	0.91047
Conjugated Linoleic Acid	0.115034	1.07745
Conjugated Linoleic Acid	0.19493	0.72028
Conjugated Linoleic Acid	0.228754	0.879233
Conjugated Linoleic Acid	0.170155	0.747674
Conjugated Linoleic Acid	0.188689	0.682683
Control	0.0447257	0.860759
Control	0.0389518	0.839235
Control	0.0238932	0.739283
Control	0.0466223	1.09039
Control	0.0458453	1.45129
Control	0.0189521	1.25975
Control	0.0286369	1.02291
Control	0.0402999	0.973758
Control	0.0336574	0.748691
Control	0.0252404	0.783654
Control	0.0325289	1.2298
Control	0.0449236	1.02246
Control	0.0448384	1.1804
Control	0.0521845	1.2585
Control	0.0567568	2.36216
Control	0.0105708	1.73362
Control	0.0337838	1.91892
Control	0.0494297	1.29024
Control	0.0420945	1.43224
Control	0.0460289	0.983755
Control	0.0289017	0.932287
Control	0.0369048	0.965476
Control	0.0413318	1.32377
Control	0.0389105	1.25486
Control	0.0230415	1.83871
Control	0.0176056	1.31338
Control	0.0310078	1.00969
Control	0.0363636	1.3875
Control	0.0351288	1.19438
Control	0.0412698	1.53651
Control	0.0391986	1.35714
Control	0.0342276	1.22572
Control	0.0384615	1.46746
Control	0.0383387	1.33759
Control	0.0245283	1.64151
Control	0.021645	2.55844
Control	0.0469417	1.79659
Control	0.0440415	1.22366
Control	0.0393535	1.26142
Control	0.0474777	1.56528
Fenofibrate	0.0398605	0.453413
Fenofibrate	0.0429952	0.396135
Fenofibrate	0.0318504	0.372093
Fenofibrate	0.0227498	0.367953
Fenofibrate	0.0433754	0.650631
Fenofibrate	0.0330579	0.794215
Fenofibrate	0.0377028	0.366506
Fenofibrate	0.034751	0.452801
Fenofibrate	0.0537505	0.391496
Fenofibrate	0.0524253	0.471828
Fenofibrate	0.0618855	0.466744
Fenofibrate	0.0376249	0.413286
Fenofibrate	0.0506472	0.576815
Fenofibrate	0.0383498	0.55491
Fenofibrate	0.0403476	0.574798
Fenofibrate	0.0514988	0.554189
Fenofibrate	0.0352811	0.562293
Fenofibrate	0.0460014	0.636235
Fenofibrate	0.045582	0.520337
Fenofibrate	0.0431433	0.476631
Fenofibrate	0.0554683	0.394035
Fenofibrate	0.0358209	0.439403
Fenofibrate	0.0441798	0.50365
Fenofibrate	0.0464269	0.558489
Fenofibrate	0.0408982	0.874098
Fenofibrate	0.0464109	0.809406
Fenofibrate	0.0340843	0.603697
Fenofibrate	0.0382567	0.447942
Fenofibrate	0.0350564	0.473559
Fenofibrate	0.0323705	0.423805
Fenofibrate	0.0502732	0.527869
Fenofibrate	0.0584989	0.611479
Fenofibrate	0.0539242	0.622531
Fenofibrate	0.0538631	0.32936
Fenofibrate	0.0418821	0.771975
Fenofibrate	0.0516987	0.814623
Fenofibrate	0.0365093	0.993767
Fenofibrate	0.0582171	0.46695
Fenofibrate	0.0637057	0.480485
Fenofibrate	0.0540236	0.496905
Fenofibrate+Etomoxir	0.0588972	0.428571
Fenofibrate+Etomoxir	0.0288089	0.244321
Fenofibrate+Etomoxir	0.0511883	0.341255
Fenofibrate+Etomoxir	0.0435074	0.627175
Fenofibrate+Etomoxir	0.0374677	1.1938
Fenofibrate+Etomoxir	0.042648	0.72056
Fenofibrate+Etomoxir	0.0438966	0.599519
Fenofibrate+Etomoxir	0.0397667	0.57105
Fenofibrate+Etomoxir	0.028412	0.463724
Fenofibrate+Etomoxir	0.0309278	0.508837
Fenofibrate+Etomoxir	0.0567376	0.424113
Fenofibrate+Etomoxir	0.0532633	0.514629
Fenofibrate+Etomoxir	0.0673712	0.764861
Fenofibrate+Etomoxir	0.0536513	0.576006
Fenofibrate+Etomoxir	0.0282132	0.785266
Fenofibrate+Etomoxir	0.0784946	1.28387
Fenofibrate+Etomoxir	0.0737123	0.840142
Fenofibrate+Etomoxir	0.0447871	0.758443
Fenofibrate+Etomoxir	0.0515395	0.708835
Fenofibrate+Etomoxir	0.0544262	0.70623
Fenofibrate+Etomoxir	0.0321324	0.261441
Fenofibrate+Etomoxir	0.035837	0.270005
Fenofibrate+Etomoxir	0.0381944	0.469246
Fenofibrate+Etomoxir	0.0335196	0.475419
Fenofibrate+Etomoxir	0.0288326	0.720816
Fenofibrate+Etomoxir	0.0401107	0.56639
Fenofibrate+Etomoxir	0.0546961	0.708287
Fenofibrate+Etomoxir	0.0305344	0.54771
Fenofibrate+Etomoxir	0.0357143	0.408228
Fenofibrate+Etomoxir	0.0316716	0.455718
Fenofibrate+Etomoxir	0.0835351	1.45763
Fenofibrate+Etomoxir	0.0821192	1.45166
Fenofibrate+Etomoxir	0.135314	2.38779
Fenofibrate+Etomoxir	0.0848287	1.53344
Fenofibrate+Etomoxir	0.0661157	1.95248
Fenofibrate+Etomoxir	0.0947776	3.22824
Fenofibrate+Etomoxir	0.0610998	1.94501
Fenofibrate+Etomoxir	0.101574	1.96996
Fenofibrate+Etomoxir	0.0725806	1.54301
Fenofibrate+Etomoxir	0.190099	2.14653
WY-14643	0.025398	0.246778
WY-14643	0.0725738	0.534599
WY-14643	0.0307032	0.377682
WY-14643	0.0469603	0.516564
WY-14643	0.0804721	1.0676
WY-14643	0.0306407	0.97493
WY-14643	0.00656168	0.238845
WY-14643	0.0391886	0.432918
WY-14643	0.0155291	0.247021
WY-14643	0.0332901	0.333766
WY-14643	0.0306905	0.519821
WY-14643	0.0459418	0.666667
WY-14643	0.029909	0.405722
WY-14643	0.0528744	0.418737
WY-14643	0.0263158	1.26096
WY-14643	0.042524	0.792867
WY-14643	0.051619	0.468325
WY-14643	0.0487805	0.43365
WY-14643	0.0496851	0.286214
WY-14643	0.0459351	0.379147
WY-14643	0.0693132	0.637051
WY-14643	0.0815642	1.08268
WY-14643	0.0912807	0.503406
WY-14643	0.0950704	1.04108
WY-14643	0.0648855	2.1145
WY-14643	0.0886957	1.81217
WY-14643	0.0628627	0.999033
WY-14643	0.090184	0.941104
WY-14643	0.077147	0.747453
WY-14643	0.0701899	0.830718
WY-14643	0.0316973	0.312883
WY-14643	0.0451588	0.345962
WY-14643	0.0239617	0.450879
WY-14643	0.0534125	0.253921
WY-14643	0.0385757	0.573294
WY-14643	0.050494	1.36553
WY-14643	0.0243655	0.39797
WY-14643	0.0650369	0.379613
WY-14643	0.0333162	0.413634
WY-14643	0.03311	0.469058

## Sheet: Fig 2G,I,K
		BF	FF	WY	Control	FF+ETO	9CLA				Control	FF	BF	WY	9CLA	FF+ETO
WT	Day 1	2.09768e+08	3.09217e+09	2.24505e+08	9.60338e+07	1.92041e+08	1.75304e+08		DELTA	Day 1	1.38477e+09	4.12372e+08	5.44353e+08	3.88775e+09	5.29566e+09	5.14059e+08			Mean	NT + Vehicle	PPARα K/O + Vehicle	PPARα K/O + Fenofibrate	PPARα K/O + Fenofibrate + Etomoxir	Control (Delta)	PPAR K/O (Delta)	PPAR K/O + Fenofibrate (Delta)	PPAR K/O + Fenofibrate + Etomoxir (Delta)
		3.1623e+08	1.80873e+09	9.70785e+07	1.34664e+08	9.20771e+07	1.41019e+08				1.85526e+08	3.44656e+08	2.18864e+08	2.16512e+08	1.77111e+08	7.19819e+08			1	645.521	118.614	121.191	94.3983	2572.18	62.5227	83.9292	300.798
		1.15755e+08	4.20461e+09	6.36835e+08	1.20195e+08	1.61066e+08	1.32744e+08				2.61907e+08	2.06956e+08	5.53838e+08	8.51043e+08	6.03369e+08	5.68548e+08			3	0.987572	1.53877	4.06209	74.9548	28.6852	22.2607	7.10147	76.3739
		1.3466e+08	4.32313e+08	2.02465e+08	1.92529e+08	1.52568e+08	1.13127e+08				4.57176e+09	1.35354e+08	2.01863e+08	1.60757e+09	3.95262e+08	2.14821e+10			5	14.8175	2.00859	5.38538	17.9987	33.7951	3399.76	326.748	12335
	Mean	1.94103e+08	2.38445e+09	2.90221e+08	1.35855e+08	1.49438e+08	1.40548e+08			Mean	1.60099e+09	2.74834e+08	3.79729e+08	1.64072e+09	1.61785e+09	5.82114e+09			SE
	SE	4.54902e+07	8.14255e+08	1.18836e+08	2.05028e+07	2.09171e+07	1.29775e+07			SE	1.02749e+09	6.31492e+07	9.78643e+07	8.01156e+08	1.22902e+09	5.22051e+09				557.55	0.95062	0.243878	0.0925206	1859.72	0.195126	0.111016	1.79236
	Ttest	0.287355	0.032825	0.247784	1	0.659186	0.85302			Ttest	1	0.245108	0.281471	0.976665	0.991945	0.457892				0.759293	4.65123	18.6842	5.71501	12.3278	43.5554	42.0966	149.111
																				6.12878	0.718015	1.93934	73.4533	14.1634	24.3215	20.1609	142.578
	Day 3	331932		385239	1.05936e+06	333294	652443			Day 3	3.40543e+07	2.36015e+06		1.31934e+07	7.66331e+07	3.1904e+06
		471996	415240	499064	117854	380385	7.95879e+06				2.29955e+06	5.84259e+06	627523	3.78371e+06	2.79687e+06	6.17035e+07
			1.13271e+06	753062	571541	765578	5.23027e+06				1.15056e+08	2.76896e+06	3.93534e+06		3.43715e+06	991659
		3.25124e+06	387691	339878	448847	275808	734062				1.46819e+06		8.11876e+06	8.32093e+06	1.69076e+08	1.42523e+06
	Mean	1.35172e+06	645214	494311	549400	438766	3.64389e+06			Mean	3.82196e+07	3.65723e+06	4.22721e+06	8.43267e+06	6.29857e+07	1.68277e+07
	SE	950620	243878	92520.6	195126	111016	1.79236e+06			SE	2.67117e+07	1.09903e+06	2.16745e+06	2.71691e+06	3.93807e+07	1.49661e+07
	Ttest	0.377149	0.768376	0.807162	1	0.63966	0.136914			Ttest	1	0.3242	0.331999	0.390362	0.621383	0.510925
	Day 5	64283.2	30809.9	7495.87	1.57894e+07	22394	3293.51			Day 5	6.75016e+06	29209.2	3.2791e+06	7827.55	617258	9.77052e+06
		268817	16754.8	82441.2	2.49135e+07	8.78956e+07	40355.8					16559.9	539133	73071.3	1.19645e+07	1.49433e+07
		20531.4	23773.2	29656.4	3.74963e+06	24641.4	1.33012e+06				5.46138e+07	28189.1	1.08709e+06
		100707		7913.9		26396.8	22912.3				4.00215e+07			22394.1	17980.2	1.2817e+07
	Mean	113585	23779.3	31876.8	1.48175e+07	2.19923e+07	349169			Mean	3.37951e+07	24652.7	1.63511e+06	34431	4.19992e+06	1.25103e+07
	SE	54277.5	4057.35	17631.3	6.12878e+06	2.19678e+07	327070			SE	1.41634e+07	4057.12	837079	19772.5	3.88616e+06	1.50109e+06
	Ttest	0.0351046	0.036626	0.0344489	1	0.79736	0.0373894			Ttest	1	0.0378155	0.0430211	0.037844	0.0570681	0.104686
		Control - WT	FF - WT	FF+ETO - WT	Control - Delta	FF - Delta	FF+ETO - Delta			WT	FF	Control	FF+ETO	Delta	Control	FF	FF+ETO
KO	Day 1	1.28044e+08	1.76268e+08	1.04191e+08	2.41713e+07	3.33961e+07	3.27208e+08		NT		3.88669e+08	2.13379e+07	1.38715e+07		7.97776e+07	5.22506e+07	3.5043e+08
		1.11101e+08	1.104e+08	7.78669e+07	1.93074e+08	1.92196e+07	7.10272e+08				6.68899e+09	1.88034e+07	2.1243e+08		4.56206e+08	1.0309e+09	1.64102e+08
		1.25152e+08	1.04463e+08	9.79248e+07	1.65162e+07	2.04336e+08	4.13455e+07				2.22925e+08	2.30397e+08	7.34045e+08		8.05399e+09	1.35797e+08	6.2854e+08
		1.10158e+08	9.36327e+07	9.76105e+07	1.63293e+07	7.87648e+07	1.24367e+08				1.16447e+10	2.31155e+09	2.55095e+08		1.69875e+09	2.30033e+07	5.69922e+09
	Mean	1.18614e+08	1.21191e+08	9.43983e+07	6.25227e+07	8.39292e+07	3.00798e+08			Mean	4.73632e+09	6.45521e+08	3.0386e+08	Mean	2.57218e+09	3.10487e+08	1.71057e+09
	SE	4.65123e+06	1.86842e+07	5.71501e+06	4.35554e+07	4.20966e+07	1.49111e+08			SE	2.75093e+09	5.5755e+08	1.52723e+08	SE	1.85972e+09	2.41323e+08	1.33297e+09
										Ttest	0.135902	0.290955	0.0937651	Ttest	0.2159	0.245642	0.246728
	Day 3	901688		289722	2.69988e+06	3.59311e+07	8.07219e+07				29279.3	56223.3	85785.5		6.49384e+06	558830	526035
			281059		5.95379e+07	3.34975e+06	1.72271e+08				1.32645e+06	43449.5	5.35433e+06		6.39543e+07	199773	1.29966e+06
		742764	6.70156e+06	2.21855e+08	1.39685e+07	242672	3.12364e+06					3.22931e+06	162776		2.31011e+07		275401
		2.97187e+06	5.20365e+06	2.72005e+06	1.09363e+08	8.70746e+07	7.83277e+08				191858	621308	15050.9		2.11915e+07	517260	1.90291e+06
	Mean	1.53877e+06	4.06209e+06	7.49548e+07	2.22607e+07	7.10147e+06	7.63739e+07			Mean	515863	987572	1.40449e+06	Mean	2.86852e+07	425288	1.001e+06
	SE	718015	1.93934e+06	7.34533e+07	2.43215e+07	2.01609e+07	1.42578e+08			SE	408003	759293	1.31696e+06	SE	1.23278e+07	113394	371341
										Ttest	0.191155	0.24111	0.327246	Ttest	0.0588933	0.00650391	0.0357863
	Day 5	4.33457e+06	5.25659e+06	312188	1.29001e+09	1.07318e+09	4.06475e+10				30809.9	1.57894e+07	22394		6.75016e+06	29209.2	9.77052e+06
		392840	6.20166e+06	24776.5	1.16916e+09	8.24496e+06	4.75684e+07				16754.8	2.49135e+07	8.78956e+07			16559.9	1.49433e+07
			14830	11971.1	4.40662e+09	9.51003e+06	4.99093e+08				23773.2	3.74963e+06	24641.4		5.46138e+07	28189.1
		1.29835e+06	1.00685e+07	7.1646e+07	6.73324e+09	2.16058e+08	8.14595e+09						26396.8		4.00215e+07		1.2817e+07
	Mean	2.00859e+06	5.38538e+06	1.79987e+07	3.39976e+09	3.26748e+08	1.2335e+10			Mean	23779.3	1.48175e+07	2.19923e+07	Mean	3.37951e+07	24652.7	1.25103e+07
	SE	1.19201e+06	2.07077e+06	1.78825e+07	1.34016e+09	2.53557e+08	9.61863e+09			SE	4057.35	6.12878e+06	2.19678e+07	SE	1.41634e+07	4057.12	1.50109e+06
										Ttest	0.00424803	0.0729454	0.43611	Ttest	0.0754882	0.00372051	0.00113278

## Sheet: Fig 2J
Type	G/B	R/B		Type (NT Experiment)	G/B	R/B			Type	Type	Average of Blue	StdDev of Blue2	Count of Blue3	SE	Average of G/B	StdDev of G/B2	Count of G/B3	SE	Average of R/B	StdDev of R/B2	Count of R/B3	SE
Fenofibrate+Etomoxir - WT	0.242147	1.36911		FF+ETO (WT)	0.0536083	0.76886			Delta	PPARα K/O+Fenofibrate+Etomoxir	0.6112	0.310526	40	0.120266	0.2753	0.0797956	40	0.0309047	2.04501	0.993788	40	0.384892				0.712775	0.276057
Fenofibrate+Etomoxir - WT	0.188862	1.34625		FF+ETO (WT)	0.162509	1.78656				PPARα K/O+Fenofibrate	0.60425	0.312638	40	0.121084	0.254115	0.0865043	35	0.0358162	2.26637	0.862502	35	0.35711				0.70467	0.272918
Fenofibrate+Etomoxir - WT	0.171088	1.28515		FF+ETO (WT)	0.147098	1.24939				PPARα K/O + Vehicle	0.708375	0.397885	40	0.1541	0.27411	0.10996	31	0.0483761	1.71789	0.660558	31	0.290607				0.8261	0.319947
Fenofibrate+Etomoxir - WT	0.315	2.2625		FF+ETO (WT)	0.137699	1.37423				NT + Vehicle	0.857493	40	0.272468	0.0963318	0.0452141	40	0.0221507	0.00783145	1.37936	40	0.604132	0.213593		0.47545	0.0247047	1	0.0024083
Fenofibrate+Etomoxir - WT	0.175799	1.06279		FF+ETO (WT)	0.134535	0.972621			WT	PPARα K/O+Fenofibrate+Etomoxir	0.860775	0.425173	40	0.164669	0.237448	0.072306	28	0.0334712	1.76638	0.709702	28	0.328528				0.799781	0.309754
Fenofibrate+Etomoxir - WT	0.257042	2.01232		FF+ETO (WT)	0.13395	0.914658				PPARα K/O+Fenofibrate	0.7766	0.524588	40	0.203172	0.250724	0.101598	40	0.0393486	2.09896	1.22411	40	0.474095				0.721571	0.279463
Fenofibrate+Etomoxir - WT	0.248837	1.27093		FF+ETO (WT)	0.0963126	1.51019				PPARα K/O + Vehicle	0.641538	0.428989	39	0.168263	0.328952	0.164314	34	0.0690258	2.379	1.18499	34	0.497796				0.59608	0.233802
Fenofibrate+Etomoxir - WT	0.287313	2.09701		FF+ETO (WT)	0.0744304	0.810904				NT + Vehicle	1.07626	40	0.40096	0.141761	0.032806	40	0.15506	0.054822	1.09676	40	0.415417	0.146872		1	0.0499762	1	0.00354402
Fenofibrate+Etomoxir - WT	0.174765	0.85815		FF+ETO (WT)	0.116966	0.867648
Fenofibrate+Etomoxir - WT	0.32	3.17778		FF+ETO (WT)	0.0758144	0.658633
Fenofibrate+Etomoxir - WT	0.205426	1.99612		FF+ETO (WT)	0.311968	2.57911
Fenofibrate+Etomoxir - WT	0.273356	3.33564		FF+ETO (WT)	0.093057	0.991235
Fenofibrate+Etomoxir - WT	0.167623	1.11481		FF+ETO (WT)	0.200581	1.75894
Fenofibrate+Etomoxir - WT	0.247423	1.94551		FF+ETO (WT)	0.187832	1.16832
Fenofibrate+Etomoxir - WT	0.319951	1.26521		FF+ETO (WT)	0.143788	2.10663
Fenofibrate+Etomoxir - WT	0.114679	0.92844		FF+ETO (WT)	0.34593	1.4916
Fenofibrate+Etomoxir - WT	0.176245	1.18646		FF+ETO (WT)	0.139407	0.596715
Fenofibrate+Etomoxir - WT	0.361419	2.29268		FF+ETO (WT)	0.10975	1.37295
Fenofibrate+Etomoxir - WT	0.241164	2.06861		FF+ETO (WT)	0.108048	1.1688
Fenofibrate+Etomoxir - WT	0.369681	2.82181		FF+ETO (WT)	0.223943	2.43277
Fenofibrate+Etomoxir - WT	0.262411	2.07979		FF+ETO (WT)	0.125867	0.399469
Fenofibrate+Etomoxir - WT	0.165932	1.32452		FF+ETO (WT)	0.0810105	1.36683
Fenofibrate+Etomoxir - WT	0.336842	2.36579		FF+ETO (WT)	0.191598	1.48437
Fenofibrate+Etomoxir - WT	0.134752	1.26525		FF+ETO (WT)	0.195408	1.27393
Fenofibrate+Etomoxir - WT	0.279461	2.94949		FF+ETO (WT)	0.0986168	0.906163
Fenofibrate+Etomoxir - WT	0.299213	1.60827		FF+ETO (WT)	0.122349	1.94734
Fenofibrate+Etomoxir - WT	0.160563	1.25211		FF+ETO (WT)	0.180051	1.68196
Fenofibrate+Etomoxir - WT	0.151556	0.916103		FF+ETO (WT)	0.0936444	0.769756
Fenofibrate+Etomoxir - Delta	0.234295	1.37521		FF+ETO (WT)	0.162093	0.682227
Fenofibrate+Etomoxir - Delta	0.220879	0.981319		FF+ETO (WT)	0.272328	0.931483
Fenofibrate+Etomoxir - Delta	0.244845	1.09407		FF+ETO (WT)	0.124253	1.34993
Fenofibrate+Etomoxir - Delta	0.234719	1.29584		FF+ETO (WT)	0.233611	1.74664
Fenofibrate+Etomoxir - Delta	0.352727	3.45455		FF+ETO (WT)	0.28543	1.11391
Fenofibrate+Etomoxir - Delta	0.311594	2.6558		FF+ETO (WT)	0.0979856	1.30852
Fenofibrate+Etomoxir - Delta	0.279612	1.78447		FF+ETO (WT)	0.113979	0.409583
Fenofibrate+Etomoxir - Delta	0.375	2.72807		FF+ETO (WT)	0.115212	1.16725
Fenofibrate+Etomoxir - Delta	0.222809	1.08025		FF+ETO (WT)	0.136577	1.74454
Fenofibrate+Etomoxir - Delta	0.427203	2.3295		FF+ETO (WT)	0.149176	0.491883
Fenofibrate+Etomoxir - Delta	0.314442	1.96892		FF+ETO (WT)	0.192575	1.06478
Fenofibrate+Etomoxir - Delta	0.379475	2.12411		FF+ETO (WT)	0.130005	1.23793
Fenofibrate+Etomoxir - Delta	0.375	1.84783		FF (WT)	0.0514054	0.415525
Fenofibrate+Etomoxir - Delta	0.273224	0.872131		FF (WT)	0.0684389	0.783294
Fenofibrate+Etomoxir - Delta	0.157385	1.95157		FF (WT)	0.047498	0.270962
Fenofibrate+Etomoxir - Delta	0.351421	3.37984		FF (WT)	0.0565298	0.706315
Fenofibrate+Etomoxir - Delta	0.184834	1.24645		FF (WT)	0.0548501	0.557796
Fenofibrate+Etomoxir - Delta	0.188109	0.860624		FF (WT)	0.0789387	0.708125
Fenofibrate+Etomoxir - Delta	0.278656	2.20949		FF (WT)	0.0654623	0.577929
Fenofibrate+Etomoxir - Delta	0.298986	1.97804		FF (WT)	0.0404753	0.635276
Fenofibrate+Etomoxir - Delta	0.140179	0.92991		FF (WT)	0.0782097	0.999376
Fenofibrate+Etomoxir - Delta	0.103966	0.47642		FF (WT)	0.0846867	0.392919
Fenofibrate+Etomoxir - Delta	0.28752	1.66825		FF (WT)	0.0446584	0.727045
Fenofibrate+Etomoxir - Delta	0.23816	1.27605		FF (WT)	0.0722065	1.10583
Fenofibrate+Etomoxir - Delta	0.196891	1.87047		FF (WT)	0.0543291	0.499907
Fenofibrate+Etomoxir - Delta	0.334239	3.11957		FF (WT)	0.0540044	0.65428
Fenofibrate+Etomoxir - Delta	0.191489	1.72534		FF (WT)	0.0764631	0.51733
Fenofibrate+Etomoxir - Delta	0.232919	1.85093		FF (WT)	0.0523448	0.68786
Fenofibrate+Etomoxir - Delta	0.315068	1.77473		FF (WT)	0.0448586	0.667557
Fenofibrate+Etomoxir - Delta	0.213618	1.54072		FF (WT)	0.0565714	1.12422
Fenofibrate+Etomoxir - Delta	0.208531	2.00316		FF (WT)	0.0832136	0.942978
Fenofibrate+Etomoxir - Delta	0.227494	1.27859		FF (WT)	0.0854411	0.627072
Fenofibrate+Etomoxir - Delta	0.261848	1.31517		FF (WT)	0.0528719	0.862375
Fenofibrate+Etomoxir - Delta	0.364312	2.24535		FF (WT)	0.0576984	1.27556
Fenofibrate+Etomoxir - Delta	0.375	4.40086		FF (WT)	0.117975	0.974347
Fenofibrate+Etomoxir - Delta	0.462185	3.92437		FF (WT)	0.0889272	0.567785
Fenofibrate+Etomoxir - Delta	0.254237	1.65593		FF (WT)	0.0632131	1.08662
Fenofibrate+Etomoxir - Delta	0.346939	3.60714		FF (WT)	0.0783544	0.803596
Fenofibrate+Etomoxir - Delta	0.302181	4.05919		FF (WT)	0.0706496	1.49185
Fenofibrate+Etomoxir - Delta	0.25	3.86		FF (WT)	0.144828	1.45576
Fenofibrate - WT	0.354217	2.01807		FF (WT)	0.127137	0.976055
Fenofibrate - WT	0.256262	0.878613		FF (WT)	0.0581908	1.26527
Fenofibrate - WT	0.190654	1.3729		FF (WT)	0.0865521	0.888741
Fenofibrate - WT	0.252912	2.24126		FF (WT)	0.0757023	0.287585
Fenofibrate - WT	0.391892	4.10811		FF (WT)	0.0990633	0.805939
Fenofibrate - WT	0.259124	3.4781		FF (WT)	0.154165	0.958289
Fenofibrate - WT	0.319899	2.52897		FF (WT)	0.170341	1.41504
Fenofibrate - WT	0.335017	2.35522		FF (WT)	0.077902	0.399436
Fenofibrate - WT	0.392593	2.38074		FF (WT)	0.0736014	0.610899
Fenofibrate - WT	0.194083	0.591124		FF (WT)	0.0334139	0.570394
Fenofibrate - WT	0.177885	1.52564		FF (WT)	0.0764925	0.282329
Fenofibrate - WT	0.383505	2.24742		FF (WT)	0.0818822	1.77566
Fenofibrate - WT	0.340532	1.93023		NT + Vehicle (WT)	0.227099	0.846909
Fenofibrate - WT	0.165362	0.683953		NT + Vehicle (WT)	0.301009	0.845537
Fenofibrate - WT	0.425577	2.93501		NT + Vehicle (WT)	0.28974	1.04409
Fenofibrate - WT	0.345972	4.2654		NT + Vehicle (WT)	0.114985	0.610231
Fenofibrate - WT	0.424658	5.44292		NT + Vehicle (WT)	0.570829	1.38723
Fenofibrate - WT	0.155835	0.492614		NT + Vehicle (WT)	0.44865	1.6215
Fenofibrate - WT	0.357282	2.10097		NT + Vehicle (WT)	0.191143	0.933875
Fenofibrate - WT	0.198288	1.99144		NT + Vehicle (WT)	0.285119	0.650015
Fenofibrate - WT	0.16302	1.38512		NT + Vehicle (WT)	0.332269	0.70578
Fenofibrate - WT	0.0548112	0.61084		NT + Vehicle (WT)	0.318381	0.602025
Fenofibrate - WT	0.05145	0.335828		NT + Vehicle (WT)	0.485002	0.984121
Fenofibrate - WT	0.221198	4.05991		NT + Vehicle (WT)	0.393135	1.25507
Fenofibrate - WT	0.275862	4.2266		NT + Vehicle (WT)	0.106242	0.781075
Fenofibrate - WT	0.126812	2.30616		NT + Vehicle (WT)	0.399193	1.51025
Fenofibrate - WT	0.192555	1.40565		NT + Vehicle (WT)	0.314398	1.34409
Fenofibrate - WT	0.302734	2.5957		NT + Vehicle (WT)	0.205712	1.17278
Fenofibrate - WT	0.0767396	0.349503		NT + Vehicle (WT)	0.230898	0.996649
Fenofibrate - WT	0.308642	2.06173		NT + Vehicle (WT)	0.577107	1.48183
Fenofibrate - WT	0.104795	0.626712		NT + Vehicle (WT)	0.155343	0.435499
Fenofibrate - WT	0.327907	2.07674		NT + Vehicle (WT)	0.151095	0.837964
Fenofibrate - WT	0.210577	1.10288		NT + Vehicle (WT)	0.256836	1.37475
Fenofibrate - WT	0.278095	2.14667		NT + Vehicle (WT)	0.156134	0.798116
Fenofibrate - WT	0.29207	1.95745		NT + Vehicle (WT)	0.52666	0.824246
Fenofibrate - WT	0.230769	2.77538		NT + Vehicle (WT)	0.181574	0.634406
Fenofibrate - WT	0.117647	3.77248		NT + Vehicle (WT)	0.155716	1.04414
Fenofibrate - WT	0.257576	1.34848		NT + Vehicle (WT)	0.312397	1.61513
Fenofibrate - WT	0.187175	2.25997		NT + Vehicle (WT)	0.303999	0.926492
Fenofibrate - WT	0.326981	0.985958		NT + Vehicle (WT)	0.617186	1.20052
Fenofibrate - Delta	0.178506	2.67213		NT + Vehicle (WT)	0.353157	0.888327
Fenofibrate - Delta	0.206612	2.76033		NT + Vehicle (WT)	0.248293	1.32125
Fenofibrate - Delta	0.11431	0.748518		NT + Vehicle (WT)	0.632565	2.30459
Fenofibrate - Delta	0.264026	2.91584		NT + Vehicle (WT)	0.21297	1.17765
Fenofibrate - Delta	0.265432	3.67901		NT + Vehicle (WT)	0.13671	0.896056
Fenofibrate - Delta	0.202514	1.95112		NT + Vehicle (WT)	0.325014	0.560104
Fenofibrate - Delta	0.178872	1.59184		NT + Vehicle (WT)	0.575511	2.01318
Fenofibrate - Delta	0.249012	1.32174		NT + Vehicle (WT)	0.393444	0.964524
Fenofibrate - Delta	0.207469	2.29461		NT + Vehicle (WT)	0.470718	1.95547
Fenofibrate - Delta	0.297101	1.83623		NT + Vehicle (WT)	0.279813	1.34935
Fenofibrate - Delta	0.27994	1.46257		NT + Vehicle (WT)	0.644302	1.05287
Fenofibrate - Delta	0.229508	2.17564		NT + Vehicle (WT)	0.242053	0.922877
Fenofibrate - Delta	0.179128	1.49221		FF+ETO (Delta)	0.0451302	0.404755
Fenofibrate - Delta	0.203685	1.58751		FF+ETO (Delta)	0.0311028	0.402162
Fenofibrate - Delta	0.135081	2.22984		FF+ETO (Delta)	0.0335288	0.430608
Fenofibrate - Delta	0.217722	2.27595		FF+ETO (Delta)	0.0531338	0.511942
Fenofibrate - Delta	0.126546	1.10276		FF+ETO (Delta)	0.0985328	1.27957
Fenofibrate - Delta	0.417085	2.61055		FF+ETO (Delta)	0.0394706	0.819246
Fenofibrate - Delta	0.235023	2.59908		FF+ETO (Delta)	0.103905	1.07136
Fenofibrate - Delta	0.423358	3.9562		FF+ETO (Delta)	0.0475383	0.369178
Fenofibrate - Delta	0.174224	1.72434		FF+ETO (Delta)	0.0419788	0.59475
Fenofibrate - Delta	0.26087	2.92977		FF+ETO (Delta)	0.049579	0.41679
Fenofibrate - Delta	0.324607	2.75916		FF+ETO (Delta)	0.0873292	1.61304
Fenofibrate - Delta	0.486068	4.58204		FF+ETO (Delta)	0.0315967	0.420239
Fenofibrate - Delta	0.388218	2.0287		FF+ETO (Delta)	0.0485334	0.502015
Fenofibrate - Delta	0.234858	1.57355		FF+ETO (Delta)	0.0762836	0.781148
Fenofibrate - Delta	0.256062	1.35694		FF+ETO (Delta)	0.045819	1.04646
Fenofibrate - Delta	0.263158	2.33428		FF+ETO (Delta)	0.0638462	1.82068
Fenofibrate - Delta	0.220459	2.44444		FF+ETO (Delta)	0.0676021	0.458685
Fenofibrate - Delta	0.425087	3.40244		FF+ETO (Delta)	0.0329109	0.648289
Fenofibrate - Delta	0.248826	2.57042		FF+ETO (Delta)	0.108248	1.11236
Fenofibrate - Delta	0.285451	3.34254		FF+ETO (Delta)	0.0541266	0.951429
Fenofibrate - Delta	0.259918	1.23256		FF+ETO (Delta)	0.0413309	0.653864
Fenofibrate - Delta	0.250903	2.49819		FF+ETO (Delta)	0.022864	0.36064
Fenofibrate - Delta	0.204394	1.27985		FF+ETO (Delta)	0.0742006	1.3397
Control - WT	0.388571	1.76429		FF+ETO (Delta)	0.0562406	0.669953
Control - WT	0.30695	1.7529		FF+ETO (Delta)	0.044049	0.453176
Control - WT	0.825939	3.31741		FF+ETO (Delta)	0.0238635	0.500049
Control - WT	0.43379	4.99087		FF+ETO (Delta)	0.0485693	1.08938
Control - WT	0.287273	1.78364		FF+ETO (Delta)	0.0192051	0.456979
Control - WT	0.366483	1.20258		FF+ETO (Delta)	0.044723	0.534137
Control - WT	0.603774	2.32615		FF+ETO (Delta)	0.0837715	1.04487
Control - WT	0.504836	1.75242		FF+ETO (Delta)	0.0410706	0.616779
Control - WT	0.345865	1.68922		FF+ETO (Delta)	0.0586125	0.994466
Control - WT	0.109989	0.909091		FF+ETO (Delta)	0.110078	1.12291
Control - WT	0.14554	1.09296		FF+ETO (Delta)	0.0540017	0.743887
Control - WT	0.184282	3.33604		FF+ETO (Delta)	0.0561885	0.755201
Control - WT	0.10757	1.03984		FF+ETO (Delta)	0.0666471	0.576436
Control - WT	0.249661	1.20081		FF+ETO (Delta)	0.0332531	0.481899
Control - WT	0.190709	2.0489		FF+ETO (Delta)	0.0570434	0.715451
Control - WT	0.279279	3.75075		FF+ETO (Delta)	0.113916	1.36416
Control - WT	0.768	2.24267		FF+ETO (Delta)	0.031497	0.707225
Control - WT	0.302469	2.35802		FF (Delta)	0.0846441	0.459619
Control - WT	0.573737	1.60202		FF (Delta)	0.075225	0.739807
Control - WT	0.195946	1.85586		FF (Delta)	0.0535248	0.895642
Control - WT	0.328125	4.79688		FF (Delta)	0.042831	0.506485
Control - WT	0.292683	3.47038		FF (Delta)	0.0379755	0.623824
Control - WT	0.373843	1.23148		FF (Delta)	0.0564907	0.637289
Control - WT	0.242553	0.97305		FF (Delta)	0.0751368	0.318627
Control - WT	0.170213	1.44415		FF (Delta)	0.038441	0.803082
Control - WT	0.317757	3.35514		FF (Delta)	0.0309928	0.649081
Control - WT	0.345528	4.18293		FF (Delta)	0.0526955	0.319199
Control - WT	0.300481	3.26923		FF (Delta)	0.12219	0.827229
Control - WT	0.279732	1.62814		FF (Delta)	0.0238045	0.49615
Control - WT	0.240909	4.75455		FF (Delta)	0.0445236	0.738478
Control - WT	0.252918	3.37743		FF (Delta)	0.0302805	0.470316
Control - WT	0.374031	2.22868		FF (Delta)	0.0303407	0.755132
Control - WT	0.239787	1.42806		FF (Delta)	0.0381955	0.355584
Control - WT	0.255155	2.72938		FF (Delta)	0.0379745	0.435308
Control - Delta	0.324771	1.2		FF (Delta)	0.0405485	0.268932
Control - Delta	0.161765	1.5		FF (Delta)	0.0405821	0.585018
Control - Delta	0.155534	0.880725		FF (Delta)	0.056441	0.384133
Control - Delta	0.27918	1.20505		FF (Delta)	0.0498672	0.289404
Control - Delta	0.392491	3.16724		FF (Delta)	0.0154107	0.267548
Control - Delta	0.162269	0.998681		FF (Delta)	0.0220544	0.406023
Control - Delta	0.210423	0.965585		FF (Delta)	0.030216	0.614414
Control - Delta	0.203008	0.938596		FF (Delta)	0.0558731	0.597251
Control - Delta	0.435424	2.97786		FF (Delta)	0.0307929	0.629874
Control - Delta	0.209814	1.17597		FF (Delta)	0.083744	0.805161
Control - Delta	0.351351	2.39339		FF (Delta)	0.0870298	1.3094
Control - Delta	0.376289	2.06186		FF (Delta)	0.0207868	0.381194
Control - Delta	0.64	1.83765		FF (Delta)	0.0426532	0.30191
Control - Delta	0.188811	1.64103		FF (Delta)	0.0725919	0.994746
Control - Delta	0.265487	2.30088		FF (Delta)	0.0232955	0.609222
Control - Delta	0.396181	1.76134		FF (Delta)	0.0485926	0.505666
Control - Delta	0.443213	1.62881		FF (Delta)	0.0385944	0.536709
Control - Delta	0.259398	1.34774		FF (Delta)	0.0565643	0.636948
Control - Delta	0.168079	1.27542		FF (Delta)	0.0475262	0.389279
Control - Delta	0.217119	1.39248		FF (Delta)	0.0376023	0.435024
Control - Delta	0.298361	1.15574		FF (Delta)	0.118986	0.841766
Control - Delta	0.133816	1.06329		FF (Delta)	0.0340536	0.74047
Control - Delta	0.254499	1.63496		FF (Delta)	0.0523925	0.30974
Control - Delta	0.250742	1.57715		NT + Vehicle (Delta)	0.028832	0.842426
Control - Delta	0.218676	1.42553		NT + Vehicle (Delta)	0.0440195	1.52394
Control - Delta	0.200692	2.88235		NT + Vehicle (Delta)	0.0615343	1.01089
Control - Delta	0.222222	2.69648		NT + Vehicle (Delta)	0.0180093	1.23611
Control - Delta	0.155906	1.87559		NT + Vehicle (Delta)	0.0351954	0.550235
Control - Delta	0.323598	1.41589		NT + Vehicle (Delta)	0.0242479	1.44187
Control - Delta	0.269113	2.90214		NT + Vehicle (Delta)	0.0809902	2.82283
Control - Delta	0.329193	1.97516		NT + Vehicle (Delta)	0.0345427	1.72014
				NT + Vehicle (Delta)	0.0416545	1.09844
				NT + Vehicle (Delta)	0.0356772	0.800866
				NT + Vehicle (Delta)	0.0211947	1.32261
				NT + Vehicle (Delta)	0.0439942	2.17731
				NT + Vehicle (Delta)	0.0219002	0.470845
				NT + Vehicle (Delta)	0.0599143	1.95638
				NT + Vehicle (Delta)	0.0796488	1.26511
				NT + Vehicle (Delta)	0.0430956	0.757838
				NT + Vehicle (Delta)	0.0208631	1.15922
				NT + Vehicle (Delta)	0.0421415	1.27069
				NT + Vehicle (Delta)	0.0587746	1.13412
				NT + Vehicle (Delta)	0.0618321	1.25373
				NT + Vehicle (Delta)	0.0275262	0.870339
				NT + Vehicle (Delta)	0.0607783	1.12574
				NT + Vehicle (Delta)	0.0165666	1.28674
				NT + Vehicle (Delta)	0.0205127	1.23568
				NT + Vehicle (Delta)	0.0211869	1.03663
				NT + Vehicle (Delta)	0.0434452	1.78187
				NT + Vehicle (Delta)	0.0202773	1.70258
				NT + Vehicle (Delta)	0.0267125	1.72965
				NT + Vehicle (Delta)	0.0305127	0.762491
				NT + Vehicle (Delta)	0.0558573	2.35807
				NT + Vehicle (Delta)	0.0570851	3.23627
				NT + Vehicle (Delta)	0.0789432	1.13748
				NT + Vehicle (Delta)	0.0223824	1.08304
				NT + Vehicle (Delta)	0.0244693	0.581939
				NT + Vehicle (Delta)	0.0593901	1.02254
				NT + Vehicle (Delta)	0.0799549	1.54201
				NT + Vehicle (Delta)	0.0903652	1.45549
				NT + Vehicle (Delta)	0.0873865	0.990071
				NT + Vehicle (Delta)	0.0745676	2.28256
				NT + Vehicle (Delta)	0.0525833	2.13774
