# Supplementary material for: Efficacy and safety of metabolic interventions for the treatment of severe COVID-19: in vitro, observational, and non-randomized open-label interventional study
Source: eLife. 2023 Jan 27;12:e79946. doi: 10.7554/eLife.79946 (PMC9937660; doi:10.7554/eLife.79946)
Supplement: Supplementary file 2. — (Tab 1-8) Characteristics of COVID-19 patients in the cohort. SBP, systolic blood pressure; DBP, diastolic blood pressure; COPD, chronic obstructive pulmonary disease; SpO2, oxygen saturation; ECMO, extracorporeal membrane oxygenation; IQR, interquartile range. Continuous variables were compared with a two-sample t-test and categorical variables with Fisher’s exact test. (Tab 9-11) Observational comparison between unique patients' visits to Hadassah Medical Center taking metabolic regulators and unique patients in various hospitalization conditions in patients with COVID-19 taking metabolic regulators in different periods. Patients taking thiazolidinediones (n=37; P<0.001), metformin (n=321; P<0.01), SGLT2 inhibitors (n=54; P<0.001), statins (n=924; P<0.001), or telmisartan (IRE1α inhibitor; n=278; P<0.001) were over-represented across all severity indicators, while patients taking fibrates (n=21) were significantly underrepresented in hospital admissions (P=0.02) and were not over-represented in other severity indicators regardless of the period examined. Observational comparison between unique patients visiting Hadassah Medical Center during (Tab 9) 11/2018–2019, (Tab 10) 11/2015–2020, or (Tab 11) 11/2010–2020 taking metabolic regulators and unique patients in various hospitalization conditions in patients with COVID-19 taking metabolic regulators. (Tab 12-20) Characteristics of patients included in the study. Patients included in the study were between the age of 45–100, that were hospitalized for more than 3 days (N=1,438). SBP, systolic blood pressure; DBP, diastolic blood pressure; COPD, chronic obstructive pulmonary disease; SpO2, oxygen saturation; ECMO, extracorporeal membrane oxygenation; IQR, interquartile range Continuous variables were compared with a two-sample t-test and categorical variables with Fisher’s exact test. (Tab 21) Cox regression model of 28days mortality in the treatment groups versus control. Adjusted HR and p-values were calculated base [file elife-79946-supp2.xlsx]

## Sheet: Full population
		Full population
Any Metabolic Regulating Drugs		1156
	Fibrates	21
	Statins	927
	Thiazolidinediones	37
	SGLT2 Inhibitors	55
	IRE1α inhibitors	282
	Metformin	322
No Metabolic Regulating Drugs		2077

## Sheet: Full population All
Drug Type: Any Metabolic Regulating Drugs
		Full population
		Any Metabolic Regulating Drugs	No Metabolic Regulating Drugs	p value
Clinical Characteristics on Admission	Age, median (IQR)	69.20 (60.5-78.2)	47.40 (32.6-64.0)	<.0001
	Female gender, n (%)	466 (40.3%)	1,014 (48.8%)	<.0001
	Heart rate, median (IQR), bpm	83.00 (73.0-94.0)	85.00 (75.0-96.0)	0.0003
	SBP, median (IQR), mmHg	131.0 (117.0-147.0)	122.0 (111.0-135.0)	<.0001
	DBP, median (IQR), mmHg	73.0 (64.0-82.0)	74.0 (66.0-82.0)	0.2831
	SpO2, median (IQR)	95.0 (93.0-97.0)	96.0 (94.0-98.0)	<.0001
	Temperature (P.O), median (IQR)	36.9 (36.6-37.3)	36.9 (36.7-37.3)	0.7806
	Smoking, n (%)	49 (4.2%)	44 (2.1%)	0.0009
Comorbidities on Admission	Asthma, n (%)	36 (3.1%)	69 (3.3%)	0.8361
	COPD, n (%)	60 (5.2%)	35 (1.7%)	<.0001
	Hypertension, n (%)	702 (60.7%)	325 (15.6%)	<.0001
	Diabetes, n (%)	636 (55.0%)	187 (9.0%)	<.0001
	Coronary heart disease, n (%)	349 (30.2%)	88 (4.2%)	<.0001
	Obesity, n (%)	125 (10.8%)	87 (4.2%)	<.0001
	Dyslipidemia, n (%)	485 (42.0%)	121 (5.8%)	<.0001
	Cerebrovascular disease, n (%)	100 (8.7%)	33 (1.6%)	<.0001
	Chronic liver disease, n (%)	24 (2.1%)	18 (0.9%)	0.0053
	Chronic kidney disease, n (%)	25 (2.2%)	14 (0.7%)	0.0003
Laboratory Examination on Admission	Platelet count, median (IQR)	201.0 (153.0-260.0)	208.0 (162.0-265.0)	0.4677
	Neutrophil count, median (IQR)	4.4 (3.0-6.4)	4.2 (2.8-6.6)	0.1724
	Lymphocyte count, median (IQR)	0.9 (0.6-1.3)	1.1 (0.7-1.6)	0.0018
	C-reactive protein, median (IQR)	8.4 (2.7-16.9)	4.2 (1.0-12.7)	0.0003
	Cardiac Troponin, median (IQR)	8.4 (2.7-16.9)	4.2 (1.0-12.7)	0.0589
	Ferritin, median (IQR)	335.0 (158.1-818.0)	240.3 (73.0-581.0)	0.0021
	Creatinine, median (IQR)	88.0 (72.0-142.0)	72.0 (59.0-87.0)	0.1607
	LDH, median (IQR)	273.0 (212.0-364.0)	236.0 (184.0-316.0)	0.0002
	D-dimer, median (IQR)	0.8 (0.5-1.5)	0.6 (0.3-1.3)	0.8673
	T.Bilirubin, median (IQR)	7.9 (5.9-11.1)	8.5 (6.3-11.9)	0.0373
	Lactic Acid, median (IQR)	2.1 (1.6-3.0)	2.2 (1.6-3.1)	0.7865
	Glucose, median (IQR)	6.5 (5.4-9.5)	5.4 (4.7-6.5)	<.0001
Statistical Outcomes	Follow-up days, median (IQR)	5.5 (2.4-11.8)	2.5 (1.1-6.4)	<.0001
	ICU admission, n (%)	231 (20.0%)	269 (13.0%)	<.0001
	Mechanically Ventilated/ECMO, n (%)	116 (10.0%)	97 (4.7%)	<.0001
	Non-invasive positive pressure ventilation, n (%)	38 (3.3%)	32 (1.5%)	0.0015
	Oxygen Supplementation, n (%)	611 (52.9%)	595 (28.6%)	<.0001
	28-Day In Hospital Death, n (%)	134 (11.6%)	106 (5.1%)	<.0001
	Alive, n (%)	997 (86.2%)	1,946 (93.7%)	<.0001

## Sheet: Full population Fibrates
Drug Type: Fibrates
		Full population
		Fibrates	No Metabolic Regulating Drugs	p value
Clinical Characteristics on Admission	Age, median (IQR)	70.10 (57.8-77.0)	47.40 (32.6-64.0)	<.0001
	Female gender, n (%)	8 (38.1%)	1,014 (48.8%)	0.3843
	Heart rate, median (IQR), bpm	82.00 (76.0-90.0)	85.00 (75.0-96.0)	0.3416
	SBP, median (IQR), mmHg	128.0 (114.0-142.0)	122.0 (111.0-135.0)	0.1126
	DBP, median (IQR), mmHg	71.0 (59.0-80.0)	74.0 (66.0-82.0)	0.9377
	SpO2, median (IQR)	94.0 (93.0-96.0)	96.0 (94.0-98.0)	0.0073
	Temperature (P.O), median (IQR)	36.9 (36.6-37.1)	36.9 (36.7-37.3)	0.3887
	Smoking, n (%)	0 (0.0%)	44 (2.1%)	1
Comorbidities on Admission	Asthma, n (%)	0 (0.0%)	69 (3.3%)	1
	COPD, n (%)	0 (0.0%)	35 (1.7%)	1
	Hypertension, n (%)	13 (61.9%)	325 (15.6%)	<.0001
	Diabetes, n (%)	11 (52.4%)	187 (9.0%)	<.0001
	Coronary heart disease, n (%)	3 (14.3%)	88 (4.2%)	0.0596
	Obesity, n (%)	4 (19.0%)	87 (4.2%)	0.0112
	Dyslipidemia, n (%)	13 (61.9%)	121 (5.8%)	<.0001
	Cerebrovascular disease, n (%)	0 (0.0%)	33 (1.6%)	1
	Chronic liver disease, n (%)	1 (4.8%)	18 (0.9%)	0.1747
	Chronic kidney disease, n (%)	0 (0.0%)	14 (0.7%)	1
Laboratory Examination on Admission	Platelet count, median (IQR)	248.0 (202.0-276.0)	208.0 (162.0-265.0)	0.0413
	Neutrophil count, median (IQR)	4.9 (3.4-7.5)	4.2 (2.8-6.6)	0.5079
	Lymphocyte count, median (IQR)	1.3 (0.9-1.6)	1.1 (0.7-1.6)	0.6963
	C-reactive protein, median (IQR)	10.2 (5.5-12.8)	4.2 (1.0-12.7)	0.1535
	Cardiac Troponin, median (IQR)	10.2 (5.5-12.8)	4.2 (1.0-12.7)	0.0058
	Ferritin, median (IQR)	367.4 (271.0-884.0)	240.3 (73.0-581.0)	0.8574
	Creatinine, median (IQR)	95.0 (72.0-121.0)	72.0 (59.0-87.0)	0.0754
	LDH, median (IQR)	268.5 (200.0-314.0)	236.0 (184.0-316.0)	0.8507
	D-dimer, median (IQR)	0.7 (0.5-1.2)	0.6 (0.3-1.3)	0.9689
	T.Bilirubin, median (IQR)	8.1 (6.1-15.8)	8.5 (6.3-11.9)	0.9102
	Lactic Acid, median (IQR)	1.7 (1.6-2.7)	2.2 (1.6-3.1)	0.6437
	Glucose, median (IQR)	6.7 (5.4-9.1)	5.4 (4.7-6.5)	0.0849
Statistical Outcomes	Follow-up days, median (IQR)	5.0 (3.2-8.7)	2.5 (1.1-6.4)	0.8395
	ICU admission, n (%)	2 (9.5%)	269 (13.0%)	1
	Mechanically Ventilated/ECMO, n (%)	3 (14.3%)	97 (4.7%)	0.0749
	Non-invasive positive pressure ventilation, n (%)	0 (0.0%)	32 (1.5%)	1
	High Flow Oxygen, n (%)	2 (9.5%)	164 (7.9%)	0.6799
	28-Day In Hospital Death, n (%)	0 (0.0%)	106 (5.1%)	0.622
	Alive, n (%)	21 (100.0%)	1,946 (93.7%)	0.6376

## Sheet: Full population Statins
Drug Type: Statins
		Full population
		Statins	No Metabolic Regulating Drugs	p value
Clinical Characteristics on Admission	Age, median (IQR)	69.30 (61.0-78.0)	47.40 (32.6-64.0)	<.0001
	Female gender, n (%)	359 (38.7%)	1,014 (48.8%)	<.0001
	Heart rate, median (IQR), bpm	82.00 (72.0-93.0)	85.00 (75.0-96.0)	<.0001
	SBP, median (IQR), mmHg	131.0 (117.0-147.0)	122.0 (111.0-135.0)	<.0001
	DBP, median (IQR), mmHg	73.0 (64.0-82.0)	74.0 (66.0-82.0)	0.1149
	SpO2, median (IQR)	95.0 (93.0-97.0)	96.0 (94.0-98.0)	<.0001
	Temperature (P.O), median (IQR)	36.9 (36.6-37.3)	36.9 (36.7-37.3)	0.4415
	Smoking, n (%)	46 (5.0%)	44 (2.1%)	<.0001
Comorbidities on Admission	Asthma, n (%)	26 (2.8%)	69 (3.3%)	0.4995
	COPD, n (%)	53 (5.7%)	35 (1.7%)	<.0001
	Hypertension, n (%)	553 (59.7%)	325 (15.6%)	<.0001
	Diabetes, n (%)	493 (53.2%)	187 (9.0%)	<.0001
	Coronary heart disease, n (%)	307 (33.1%)	88 (4.2%)	<.0001
	Obesity, n (%)	100 (10.8%)	87 (4.2%)	<.0001
	Dyslipidemia, n (%)	432 (46.6%)	121 (5.8%)	<.0001
	Cerebrovascular disease, n (%)	86 (9.3%)	33 (1.6%)	<.0001
	Chronic liver disease, n (%)	21 (2.3%)	18 (0.9%)	0.0027
	Chronic kidney disease, n (%)	23 (2.5%)	14 (0.7%)	<.0001
Laboratory Examination on Admission	Platelet count, median (IQR)	196.0 (150.0-255.0)	208.0 (162.0-265.0)	0.1069
	Neutrophil count, median (IQR)	4.5 (3.0-6.4)	4.2 (2.8-6.6)	0.1587
	Lymphocyte count, median (IQR)	0.9 (0.7-1.3)	1.1 (0.7-1.6)	0.0033
	C-reactive protein, median (IQR)	7.9 (2.6-16.9)	4.2 (1.0-12.7)	0.0078
	Cardiac Troponin, median (IQR)	7.9 (2.6-16.9)	4.2 (1.0-12.7)	0.0429
	Ferritin, median (IQR)	341.0 (155.0-827.9)	240.3 (73.0-581.0)	0.0014
	Creatinine, median (IQR)	90.0 (72.5-152.0)	72.0 (59.0-87.0)	0.146
	LDH, median (IQR)	273.0 (212.0-363.0)	236.0 (184.0-316.0)	0.0002
	D-dimer, median (IQR)	0.8 (0.5-1.5)	0.6 (0.3-1.3)	0.38
	T.Bilirubin, median (IQR)	8.0 (5.9-11.2)	8.5 (6.3-11.9)	0.0362
	Lactic Acid, median (IQR)	2.2 (1.5-3.0)	2.2 (1.6-3.1)	0.8763
	Glucose, median (IQR)	6.5 (5.3-9.5)	5.4 (4.7-6.5)	0.0002
Statistical Outcomes	Follow-up days, median (IQR)	5.7 (2.4-12.5)	2.5 (1.1-6.4)	<.0001
	ICU admission, n (%)	186 (20.1%)	269 (13.0%)	<.0001
	Mechanically Ventilated/ECMO, n (%)	94 (10.1%)	97 (4.7%)	<.0001
	Non-invasive positive pressure ventilation, n (%)	29 (3.1%)	32 (1.5%)	0.0072
	High Flow Oxygen, n (%)	151 (16.3%)	164 (7.9%)	<.0001
	28-Day In Hospital Death, n (%)	112 (12.1%)	106 (5.1%)	<.0001
	Alive, n (%)	793 (85.5%)	1,946 (93.7%)	<.0001

## Sheet: Full population IRE1ai
Drug Type: IRE1α inhibitors
		Full population
		IRE1α inhibitors	No Metabolic Regulating Drugs	p value
Clinical Characteristics on Admission	Age, median (IQR)	70.00 (60.4-80.0)	47.40 (32.6-64.0)	<.0001
	Female gender, n (%)	135 (47.9%)	1,014 (48.8%)	0.7996
	Heart rate, median (IQR), bpm	83.00 (72.0-93.0)	85.00 (75.0-96.0)	0.0045
	SBP, median (IQR), mmHg	138.0 (122.0-150.0)	122.0 (111.0-135.0)	<.0001
	DBP, median (IQR), mmHg	74.0 (65.0-84.0)	74.0 (66.0-82.0)	0.3948
	SpO2, median (IQR)	95.0 (93.0-97.0)	96.0 (94.0-98.0)	0.0002
	Temperature (P.O), median (IQR)	37.0 (36.7-37.5)	36.9 (36.7-37.3)	0.054
	Smoking, n (%)	6 (2.1%)	44 (2.1%)	1
Comorbidities on Admission	Asthma, n (%)	9 (3.2%)	69 (3.3%)	1
	COPD, n (%)	12 (4.3%)	35 (1.7%)	0.0097
	Hypertension, n (%)	223 (79.1%)	325 (15.6%)	<.0001
	Diabetes, n (%)	138 (48.9%)	187 (9.0%)	<.0001
	Coronary heart disease, n (%)	80 (28.4%)	88 (4.2%)	<.0001
	Obesity, n (%)	33 (11.7%)	87 (4.2%)	<.0001
	Dyslipidemia, n (%)	112 (39.7%)	121 (5.8%)	<.0001
	Cerebrovascular disease, n (%)	15 (5.3%)	33 (1.6%)	0.0003
	Chronic liver disease, n (%)	4 (1.4%)	18 (0.9%)	0.3243
	Chronic kidney disease, n (%)	7 (2.5%)	14 (0.7%)	0.0085
Laboratory Examination on Admission	Platelet count, median (IQR)	195.5 (155.0-253.0)	208.0 (162.0-265.0)	0.4585
	Neutrophil count, median (IQR)	4.4 (2.9-6.6)	4.2 (2.8-6.6)	0.6049
	Lymphocyte count, median (IQR)	0.9 (0.6-1.2)	1.1 (0.7-1.6)	<.0001
	C-reactive protein, median (IQR)	9.0 (2.7-17.5)	4.2 (1.0-12.7)	0.0196
	Cardiac Troponin, median (IQR)	9.0 (2.7-17.5)	4.2 (1.0-12.7)	0.2798
	Ferritin, median (IQR)	364.0 (186.4-901.5)	240.3 (73.0-581.0)	0.0723
	Creatinine, median (IQR)	97.0 (78.0-147.0)	72.0 (59.0-87.0)	0.9016
	LDH, median (IQR)	273.0 (211.0-381.0)	236.0 (184.0-316.0)	0.0461
	D-dimer, median (IQR)	0.9 (0.5-1.7)	0.6 (0.3-1.3)	0.9668
	T.Bilirubin, median (IQR)	8.6 (6.2-11.3)	8.5 (6.3-11.9)	0.3932
	Lactic Acid, median (IQR)	2.0 (1.4-2.5)	2.2 (1.6-3.1)	0.0746
	Glucose, median (IQR)	6.4 (5.4-9.0)	5.4 (4.7-6.5)	0.0954
Statistical Outcomes	Follow-up days, median (IQR)	6.1 (3.2-12.6)	2.5 (1.1-6.4)	0.0042
	ICU admission, n (%)	63 (22.3%)	269 (13.0%)	<.0001
	Mechanically Ventilated/ECMO, n (%)	33 (11.7%)	97 (4.7%)	<.0001
	Non-invasive positive pressure ventilation, n (%)	13 (4.6%)	32 (1.5%)	0.0016
	High Flow Oxygen, n (%)	51 (18.1%)	164 (7.9%)	<.0001
	28-Day In Hospital Death, n (%)	29 (10.3%)	106 (5.1%)	0.0014
	Alive, n (%)	246 (87.2%)	1,946 (93.7%)	0.0003

## Sheet: Full population Metformin
Drug Type: Metformin
		Full population
		Metformin	No Metabolic Regulating Drugs	p value
Clinical Characteristics on Admission	Age, median (IQR)	69.00 (61.4-76.4)	47.40 (32.6-64.0)	<.0001
	Female gender, n (%)	146 (45.3%)	1,014 (48.8%)	0.2552
	Heart rate, median (IQR), bpm	85.00 (74.0-96.0)	85.00 (75.0-96.0)	0.6602
	SBP, median (IQR), mmHg	126.0 (115.0-144.0)	122.0 (111.0-135.0)	<.0001
	DBP, median (IQR), mmHg	72.5 (65.0-81.0)	74.0 (66.0-82.0)	0.3411
	SpO2, median (IQR)	95.0 (93.0-97.0)	96.0 (94.0-98.0)	<.0001
	Temperature (P.O), median (IQR)	36.9 (36.6-37.4)	36.9 (36.7-37.3)	0.4533
	Smoking, n (%)	11 (3.4%)	44 (2.1%)	0.1592
Comorbidities on Admission	Asthma, n (%)	14 (4.3%)	69 (3.3%)	0.3275
	COPD, n (%)	12 (3.7%)	35 (1.7%)	0.027
	Hypertension, n (%)	208 (64.6%)	325 (15.6%)	<.0001
	Diabetes, n (%)	322 (100.0%)	187 (9.0%)	<.0001
	Coronary heart disease, n (%)	95 (29.5%)	88 (4.2%)	<.0001
	Obesity, n (%)	43 (13.4%)	87 (4.2%)	<.0001
	Dyslipidemia, n (%)	135 (41.9%)	121 (5.8%)	<.0001
	Cerebrovascular disease, n (%)	23 (7.1%)	33 (1.6%)	<.0001
	Chronic liver disease, n (%)	6 (1.9%)	18 (0.9%)	0.1225
	Chronic kidney disease, n (%)	3 (0.9%)	14 (0.7%)	0.49
Laboratory Examination on Admission	Platelet count, median (IQR)	210.0 (161.0-270.0)	208.0 (162.0-265.0)	0.2644
	Neutrophil count, median (IQR)	4.2 (3.1-5.7)	4.2 (2.8-6.6)	0.872
	Lymphocyte count, median (IQR)	1.0 (0.7-1.4)	1.1 (0.7-1.6)	0.0088
	C-reactive protein, median (IQR)	9.1 (2.9-17.8)	4.2 (1.0-12.7)	0.004
	Cardiac Troponin, median (IQR)	9.1 (2.9-17.8)	4.2 (1.0-12.7)	0.242
	Ferritin, median (IQR)	257.9 (111.8-546.3)	240.3 (73.0-581.0)	0.5919
	Creatinine, median (IQR)	85.0 (69.0-113.0)	72.0 (59.0-87.0)	0.515
	LDH, median (IQR)	265.0 (209.0-344.0)	236.0 (184.0-316.0)	0.1118
	D-dimer, median (IQR)	0.7 (0.5-1.4)	0.6 (0.3-1.3)	0.6486
	T.Bilirubin, median (IQR)	7.6 (6.0-10.4)	8.5 (6.3-11.9)	0.0006
	Lactic Acid, median (IQR)	2.4 (1.7-2.9)	2.2 (1.6-3.1)	0.7737
	Glucose, median (IQR)	7.9 (6.0-11.4)	5.4 (4.7-6.5)	<.0001
Statistical Outcomes	Follow-up days, median (IQR)	4.8 (2.4-9.6)	2.5 (1.1-6.4)	0.0143
	ICU admission, n (%)	65 (20.2%)	269 (13.0%)	0.0009
	Mechanically Ventilated/ECMO, n (%)	33 (10.2%)	97 (4.7%)	0.0002
	Non-invasive positive pressure ventilation, n (%)	12 (3.7%)	32 (1.5%)	0.0122
	High Flow Oxygen, n (%)	54 (16.8%)	164 (7.9%)	<.0001
	28-Day In Hospital Death, n (%)	27 (8.4%)	106 (5.1%)	0.025
	Alive, n (%)	289 (89.8%)	1,946 (93.7%)	0.0124

## Sheet: Full population SGLT2i
Drug Type: SGLT2 Inhibitors
		Full population
		SGLT2 Inhibitors	No Metabolic Regulating Drugs	p value
Clinical Characteristics on Admission	Age, median (IQR)	65.70 (58.2-75.5)	47.40 (32.6-64.0)	<.0001
	Female gender, n (%)	15 (27.3%)	1,014 (48.8%)	0.0015
	Heart rate, median (IQR), bpm	88.00 (77.0-99.0)	85.00 (75.0-96.0)	0.4966
	SBP, median (IQR), mmHg	122.0 (110.0-137.0)	122.0 (111.0-135.0)	0.5296
	DBP, median (IQR), mmHg	71.5 (62.0-79.0)	74.0 (66.0-82.0)	0.3748
	SpO2, median (IQR)	94.0 (92.0-96.0)	96.0 (94.0-98.0)	<.0001
	Temperature (P.O), median (IQR)	36.8 (36.6-37.4)	36.9 (36.7-37.3)	0.7199
	Smoking, n (%)	0 (0.0%)	44 (2.1%)	0.6277
Comorbidities on Admission	Asthma, n (%)	1 (1.8%)	69 (3.3%)	1
	COPD, n (%)	1 (1.8%)	35 (1.7%)	0.6128
	Hypertension, n (%)	39 (70.9%)	325 (15.6%)	<.0001
	Diabetes, n (%)	55 (100.0%)	187 (9.0%)	<.0001
	Coronary heart disease, n (%)	22 (40.0%)	88 (4.2%)	<.0001
	Obesity, n (%)	5 (9.1%)	87 (4.2%)	0.0855
	Dyslipidemia, n (%)	24 (43.6%)	121 (5.8%)	<.0001
	Cerebrovascular disease, n (%)	2 (3.6%)	33 (1.6%)	0.2277
	Chronic liver disease, n (%)	2 (3.6%)	18 (0.9%)	0.0923
	Chronic kidney disease, n (%)	1 (1.8%)	14 (0.7%)	0.3252
Laboratory Examination on Admission	Platelet count, median (IQR)	173.0 (138.0-224.0)	208.0 (162.0-265.0)	0.0002
	Neutrophil count, median (IQR)	4.6 (3.1-6.4)	4.2 (2.8-6.6)	0.796
	Lymphocyte count, median (IQR)	0.8 (0.6-1.1)	1.1 (0.7-1.6)	0.0002
	C-reactive protein, median (IQR)	10.9 (4.1-21.2)	4.2 (1.0-12.7)	0.1351
	Cardiac Troponin, median (IQR)	10.9 (4.1-21.2)	4.2 (1.0-12.7)	0.0184
	Ferritin, median (IQR)	263.0 (158.0-669.5)	240.3 (73.0-581.0)	0.5007
	Creatinine, median (IQR)	99.0 (75.0-120.0)	72.0 (59.0-87.0)	0.0346
	LDH, median (IQR)	288.0 (195.0-401.0)	236.0 (184.0-316.0)	0.4213
	D-dimer, median (IQR)	0.7 (0.4-1.6)	0.6 (0.3-1.3)	0.0747
	T.Bilirubin, median (IQR)	7.8 (6.4-11.6)	8.5 (6.3-11.9)	0.814
	Lactic Acid, median (IQR)	2.4 (1.8-3.1)	2.2 (1.6-3.1)	0.8862
	Glucose, median (IQR)	8.9 (6.1-9.9)	5.4 (4.7-6.5)	<.0001
Statistical Outcomes	Follow-up days, median (IQR)	7.7 (3.8-13.1)	2.5 (1.1-6.4)	0.2203
	ICU admission, n (%)	16 (29.1%)	269 (13.0%)	0.0018
	Mechanically Ventilated/ECMO, n (%)	8 (14.5%)	97 (4.7%)	0.0047
	Non-invasive positive pressure ventilation, n (%)	3 (5.5%)	32 (1.5%)	0.0594
	High Flow Oxygen, n (%)	12 (21.8%)	164 (7.9%)	0.0013
	28-Day In Hospital Death, n (%)	10 (18.2%)	106 (5.1%)	0.0006
	Alive, n (%)	45 (81.8%)	1,946 (93.7%)	0.0026

## Sheet: Full population TZDs
Drug Type: Thiazolidinediones
		Full population
		Thiazolidinediones	No Metabolic Regulating Drugs	p value
Clinical Characteristics on Admission	Age, median (IQR)	61.70 (58.0-70.0)	47.40 (32.6-64.0)	<.0001
	Female gender, n (%)	18 (48.6%)	1,014 (48.8%)	1
	Heart rate, median (IQR), bpm	92.00 (80.0-99.0)	85.00 (75.0-96.0)	0.2216
	SBP, median (IQR), mmHg	131.0 (121.0-144.0)	122.0 (111.0-135.0)	0.0022
	DBP, median (IQR), mmHg	76.0 (65.0-82.0)	74.0 (66.0-82.0)	0.9832
	SpO2, median (IQR)	95.0 (93.0-96.0)	96.0 (94.0-98.0)	0.0395
	Temperature (P.O), median (IQR)	37.1 (36.8-37.5)	36.9 (36.7-37.3)	0.3582
	Smoking, n (%)	0 (0.0%)	44 (2.1%)	1
Comorbidities on Admission	Asthma, n (%)	0 (0.0%)	69 (3.3%)	0.6317
	COPD, n (%)	2 (5.4%)	35 (1.7%)	0.1356
	Hypertension, n (%)	23 (62.2%)	325 (15.6%)	<.0001
	Diabetes, n (%)	37 (100.0%)	187 (9.0%)	<.0001
	Coronary heart disease, n (%)	12 (32.4%)	88 (4.2%)	<.0001
	Obesity, n (%)	8 (21.6%)	87 (4.2%)	0.0002
	Dyslipidemia, n (%)	15 (40.5%)	121 (5.8%)	<.0001
	Cerebrovascular disease, n (%)	4 (10.8%)	33 (1.6%)	0.0035
	Chronic liver disease, n (%)	1 (2.7%)	18 (0.9%)	0.286
	Chronic kidney disease, n (%)	1 (2.7%)	14 (0.7%)	0.2334
Laboratory Examination on Admission	Platelet count, median (IQR)	218.0 (161.0-311.0)	208.0 (162.0-265.0)	0.1659
	Neutrophil count, median (IQR)	4.6 (2.6-5.8)	4.2 (2.8-6.6)	0.7137
	Lymphocyte count, median (IQR)	1.2 (0.9-1.4)	1.1 (0.7-1.6)	0.3101
	C-reactive protein, median (IQR)	6.7 (1.2-14.8)	4.2 (1.0-12.7)	0.0613
	Cardiac Troponin, median (IQR)	6.7 (1.2-14.8)	4.2 (1.0-12.7)	0.7016
	Ferritin, median (IQR)	192.1 (70.0-295.5)	240.3 (73.0-581.0)	0.0099
	Creatinine, median (IQR)	79.0 (62.0-103.0)	72.0 (59.0-87.0)	0.1521
	LDH, median (IQR)	282.0 (187.5-401.5)	236.0 (184.0-316.0)	0.0811
	D-dimer, median (IQR)	0.6 (0.4-0.7)	0.6 (0.3-1.3)	<.0001
	T.Bilirubin, median (IQR)	7.2 (6.4-9.8)	8.5 (6.3-11.9)	0.0353
	Lactic Acid, median (IQR)	1.9 (1.6-2.5)	2.2 (1.6-3.1)	0.1144
	Glucose, median (IQR)	10.2 (6.5-12.5)	5.4 (4.7-6.5)	<.0001
Statistical Outcomes	Follow-up days, median (IQR)	4.9 (2.6-11.0)	2.5 (1.1-6.4)	0.3565
	ICU admission, n (%)	8 (21.6%)	269 (13.0%)	0.1363
	Mechanically Ventilated/ECMO, n (%)	5 (13.5%)	97 (4.7%)	0.0302
	Non-invasive positive pressure ventilation, n (%)	2 (5.4%)	32 (1.5%)	0.118
	High Flow Oxygen, n (%)	6 (16.2%)	164 (7.9%)	0.115
	28-Day In Hospital Death, n (%)	4 (10.8%)	106 (5.1%)	0.1228
	Alive, n (%)	32 (86.5%)	1,946 (93.7%)	0.0849

## Sheet: 1 Years Period
Period for non-COVID-19 hospital visits: 1 Year
		Fibrates	Statins	Thiazolidinediones	SGLT2 Inhibitors	IRE1α inhibitors	Metformin	All subjects Over 30
Non COVID-19 Hospitalization	N	794	9661	115	543	3166	3988	51483
	%	0.0154	0.1877	0.0022	0.0105	0.0615	0.0775	1
COVID-19 Hospitalization	N	21	924	37	54	278	321	2806
	%	0.0075	0.3293	0.0132	0.0192	0.0991	0.1144	1
	Relative Risk (compared to non COVID-19 hospital visits)	0.49	1.75	5.9	1.82	1.61	1.48	1
	95% Lower Confidence Limit	0.32	1.66	4.08	1.38	1.43	1.33
	95% Upper Confidence Limit	0.75	1.86	8.53	2.41	1.81	1.64
	p-value	0.001	<.0001	<.0001	<.0001	<.0001	<.0001
COVID-19 ICU	N	2	185	8	16	62	65	480
	%	0.0042	0.3854	0.0167	0.0333	0.1292	0.1354	1
	Relative Risk (compared to non COVID-19 hospital visits)	0.27	2.05	7.46	3.16	2.1	1.75	1
	95% Lower Confidence Limit	0.07	1.83	3.66	1.94	1.66	1.39
	95% Upper Confidence Limit	1.08	2.3	15.19	5.15	2.66	2.2
	p-value	0.064	<.0001	<.0001	<.0001	<.0001	<.0001
COVID-19 Deceased within 28 days	N	0	112	4	10	29	27	237
	%	0	0.4726	0.0169	0.0422	0.1224	0.1139	1
	Relative Risk (compared to non COVID-19 hospital visits)	0	2.52	7.56	4	1.99	1.47	1
	95% Lower Confidence Limit	N.E.	2.2	2.81	2.17	1.41	1.03
	95% Upper Confidence Limit	N.E.	2.88	20.31	7.38	2.8	2.1
	p-value	N.E.	<.0001	<.0001	<.0001	<.0001	0.0339

## Sheet: 5 Years Period
Period for non-COVID-19 hospital visits: 5 Years
		Fibrates	Statins	Thiazolidinediones	SGLT2 Inhibitors	IRE1α inhibitors	Metformin	All subjects Over 30
Non COVID-19 Hospitalization	N	3249	46030	490	2057	12675	17536	249939
	%	0.013	0.1842	0.002	0.0082	0.0507	0.0702	1
COVID-19 Hospitalization	N	21	924	37	54	278	321	2806
	%	0.0075	0.3293	0.0132	0.0192	0.0991	0.1144	1
	Relative Risk (compared to non COVID-19 hospital visits)	0.58	1.79	6.73	2.34	1.95	1.63	1
	95% Lower Confidence Limit	0.38	1.69	4.83	1.79	1.75	1.47
	95% Upper Confidence Limit	0.88	1.89	9.38	3.06	2.19	1.81
	p-value	0.0114	<.0001	<.0001	<.0001	<.0001	<.0001
COVID-19 ICU	N	2	185	8	16	62	65	480
	%	0.0042	0.3854	0.0167	0.0333	0.1292	0.1354	1
	Relative Risk (compared to non COVID-19 hospital visits)	0.32	2.09	8.5	4.05	2.55	1.93	1
	95% Lower Confidence Limit	0.08	1.87	4.25	2.5	2.02	1.54
	95% Upper Confidence Limit	1.28	2.34	17	6.57	3.22	2.42
	p-value	0.107	<.0001	<.0001	<.0001	<.0001	<.0001
COVID-09 Deceased within 28 days	N	0	112	4	10	29	27	237
	%	0	0.4726	0.0169	0.0422	0.1224	0.1139	1
	Relative Risk (compared to non COVID-19 hospital visits)	0	2.57	8.61	5.13	2.41	1.62	1
	95% Lower Confidence Limit	N.E.	2.24	3.24	2.79	1.72	1.14
	95% Upper Confidence Limit	N.E.	2.94	22.84	9.42	3.39	2.32
	p-value	N.E.	<.0001	<.0001	<.0001	<.0001	0.0075

[truncated: 10 more sheets: 10 Years Period, Severe Population, Severe Population All, Severe Population Fibrates, Severe Population Statins, Severe Population IRE1ai , Severe Population Metformin, Severe Population SGLT2i, Severe Population TZDs, Mortality]
