# Supplementary material for: Efficacy and safety of metabolic interventions for the treatment of severe COVID-19: in vitro, observational, and non-randomized open-label interventional study
Source: eLife. 2023 Jan 27;12:e79946. doi: 10.7554/eLife.79946 (PMC9937660; doi:10.7554/eLife.79946)
Supplement: Supplementary file 3. — (Tab 1) Comparative Cohort of the Outpatient Lipid Clinics of the University of Bologna and of the Niguarda Hospital in Milan. (A) Characteristics of included patients stratified by lipid-lowering treatment. A cohort of 2,123 patients (M: 48.1%, F: 51.9%) on statins (1,791, mean age 59.2±15.2 years), fenofibrate (220, mean age 60.7±15.4 years) or both (112, mean age 62.9±16.3 years) were interviewed. Patients on statins were significantly younger than those on both drugs (P=0.023). 177 patients received a diagnosis of COVID by molecular swab: 9.2% of statin-treated subjects, 3.2% of fenofibrate-treated ones, and 5.4% of those treated with both statins and fenofibrate (P=0.005) without differences in the source of exposition (family members, co-workers; P=0.648). (B) Disease severity stratified by lipid-lowering treatment. 134 reported mild COVID-19 symptoms and 31 patients reported severe COVID-19 symptoms, requiring hospitalization: 1.7% of statin-treated subjects, 0.5% of fenofibrate-treated ones, and 0% of those treated with both statins and fenofibrate (P=0.022) without differences in the source of exposure. (C) Characteristics of included patients according to the personal history of COVID. Patients affected by COVID were more frequently obese, with COPD and/or cardiovascular diseases, and had strict contact with COVID-affected subjects, independent of the lipid-lowering treatment. (D) Characteristics of patients exposed to contact with affected people (n=254). Out of 254 patients reporting contact with affected people, 45 became positive for COVID. 93.3% were in treatment with statins 4.4% with fenofibrate and 4.5% with both (P=0.059). Affected to exposed to positive contacts ratio according to background lipid-lowering was 20.5% in patients treated with statins 7.4% with fenofibrate and 4.5% with both (P=0.059). (Tab 2) Comparative cohort in the American veteran’s health administration (VHA) registry. (A) Characteristics of fenofibrate users compared with non [file elife-79946-supp3.xlsx]

## Sheet: Italian Study
A
	All (N=2123)	Statin (N=1791)	Fenofibrate (N=220)	Both (N=112)
% Total		84,4%	10,4%	5,3%
Demographics					p
Age, years	59.6 ± 15.3	59.2 ± 15.2	60.8 ± 15.4	62.9 ± 16.3	0.023
Female, n (%)	1102 (51.9)	955 (53.3)	93 (42.2)	54 (48.2)	0.006
Comorbidities					p
Obesity, n (%)	410 (19.3)	338 (18.9)	47 (21.4)	25 (22.3)	0.48
COPD, n (%)	203 (9.6)	174 (9.7)	21 (9.5)	8 (7.1)	0.668
ASCVD, n (%)	454 (21.4)	379 (21.2)	25 (11.4)	50 (44.6)	<0.001
COVID					p
Personal history of COVID	177 (8.3)	164 (9.2)	7 (3.2)	6 (5.4)	0.005
Contact with affected people	254 (12.0)	205 (11.4)	27 (12.3)	22 (19.6)	0.648
B
			All (N=2123)	Statin (N=1791)	Fenofibrate (N=220)	Both (N=112)
		% Total		0.844	0.104	0.053
COVID severity	No infection	Count	1946	1627	213	106
		% in COVID severity	1	0.836	0.109	0.054
		% in Lipid Lowering Drugs	0.917	0.908	0.968	0.946
	Mild	Count	146	134	6	6
		% in COVID severity	1	0.918	0.041	0.041
		% in Lipid Lowering Drugs	0.069	0.075	0.027	0.054
	Severe	Count	31	30	1	0
		% in COVID severity	1	0.968	0.032	0
		% in Lipid Lowering Drugs	0.015	0.017	0.005	0
Total		Count	2123	1791	220	112
		% in COVID severity	1	0.844	0.104	0.053
		% in Lipid Lowering Drugs	1	1	1	1
C
	Personal history of COVID
	Yes	No	p
	(N=177)	(N=1946)
Demographics
Age, years	44.7 ± 19.2	60.7 ± 14.3	<0.001
Female, n (%)	88 (49.7)	1014 (52.1)	0.542
Comorbidities
Obesity, n (%)	47 (26.6)	363 (18.7)	0.011
COPD, n (%)	25 (14.1)	178 (9.1)	0.031
ASCVD, n (%)	56 (31.6)	398 (20.5)	0.001
Lipid-lowering treatment
Statin, n (%)	164 (92.7)	1627 (83.6)	0.002
Fenofibrate, n (%)	7 (4.0)	213 (10.9)	0.003
Both, n (%)	6 (3.4)	106 (5.4)	0.241
COVID exposure
Contacts with affected people	45 (25.4)	209 (10.7)	<0.001
D
	Personal history of COVID
	Yes	No	p
	(N=45)	(N=209)
Demographics
Age, years	51.7 ± 18.3	57.4 ± 15.0	0.109
Female, n (%)	24 (46.7)	116 (55.5)	0.791
Comorbidities
Obesity, n (%)	4 (8.9)	37 (17.7)	0.145
COPD, n (%)	5 (11.1)	9 (4.3)	0.07
ASCVD, n (%)	10 (22.2)	35 (16.7)	0.383
Lipid-lowering treatment
Statin, n (%)	42 (93.3)	163 (78.0)	0.018
Fenofibrate, n (%)	2 (4.4)	25 (12)	0.138
Both, n (%)	1 (2.2)	21 (10.0)	0.09

## Sheet: USA Study
A
	Fenofibrate users	Non-users	Fenofibrate users	Non-users	Standardized Difference After Matching
	Before Matching		After 1:5 Matching
Fenofibrate users (N=4,492) vs. non-users (N=915,403)
Mean Age, years	53.7	57.9	57.2	57.9	0.063
BMI, kg/m2	32.6	32.7	31.1	32.3	0.008
Male sex	0.97	0.93	0.93	0.93	0.014
Black race	0.08	0.19	0.19	0.2	0.029
Cardiovascular disease	0.09	0.07	0.06	0.07	0.051
Heart failure	0.01	0.01	0.01	0.01	0.039
Diabetes mellitus	0.39	0.22	0.2	0.22	0.039
Chronic lung disease	0.19	0.19	0.17	0.19	0.048
Chronic liver disease	0.06	0.06	0.05	0.06	0.037
Dementia	0.03	0.03	0.01	0.03	0.083
Current or former smoker	0.35	0.31	0.32	0.31	0.029
Fenofibrate users (N=4,492) vs. statin users (N=401,811)
Mean Age, years	53.7	59.2	59.4	59.1	0.023
BMI, kg/m2	32.6	32.5	31.4	32.4	0.016
Male sex	0.97	0.95	0.96	0.95	0.032
Black race	0.08	0.18	0.16	0.18	0.048
Cardiovascular disease	0.09	0.09	0.08	0.09	0.04
Heart failure	0.01	0.02	0.01	0.02	0.023
Diabetes mellitus	0.39	0.29	0.28	0.29	0.022
Chronic lung disease	0.19	0.19	0.18	0.19	0.036
Chronic liver disease	0.06	0.05	0.05	0.05	0.018
Dementia	0.03	0.03	0.02	0.02	0.011
Current or former smoker	0.35	0.31	0.3	0.31	0.028
Fenofibrate users (N=4,492) vs. TZD users (N=9,045)
Mean Age, years	53.8	57	56.7	57	0.025
BMI, kg/m2	32.2	33.1	32.5	32.8	0.016
Male sex	0.96	0.95	0.95	0.95	0.02
Black race	0.08	0.18	0.18	0.18	0.001
Cardiovascular disease	0.09	0.06	0.06	0.06	0.01
Heart failure	0.02	0.09	0.01	0.01	0.019
Diabetes mellitus	0.37	1	1	1	0.007
Chronic lung disease	0.19	0.16	0.16	0.16	0.003
Chronic liver disease	0.06	0.05	0.05	0.05	0.006
Dementia	0.03	0.02	0.02	0.02	0.022
Current or former smoker	0.35	0.26	0.25	0.26	0.01
B
	Fenofibrate users,	Non-users, median (IQR)	Median difference (95% CI)	Median difference
	median (IQR)			(95% CI) after matching
Fenofibrate users vs. non-users	5 (3, 10)	5 (2, 13)	0 (-5, 5)	-2 (-14, 11)
Fenofibrate users vs. statin users	5 (3, 10)	5 (2, 11)	0 (-3, 3)	-2 (-12, 8)
Fenofibrate users vs. TZD users	5 (3, 10)	5, (2, 14)	0 (-6, 6)	-2 (-7, 3)
C
	Fenofibrate users	Non-users	OR (95% CI) after matching
	Events / Total N (%)	Events / Total N
Fenofibrate users vs. non-users
SARS-CoV-2 positive	32 / 4,492 (0.7%)	5,108 / 915,403 (0.6%)	0.78 (0.47-1.28)
COVID-19 hospitalization	15 / 4,492 (0.3%)	2,008 / 915,403 (0.2%)	0.60 (0.28-1.28)
Mechanical ventilation	3 / 4,492 (0.1%)	240 / 915,403 (0.1%)	0.45 (0.13-1.51)
COVID-19 death	1 / 4,492 (0.02%)	260 / 915,403 (0.03%)	0.98 (0.14-7.01)
Fenofibrate users vs. statin users
SARS-CoV-2 positive	32 / 4,492 (0.7%)	3,052 / 401,811 (0.8%)	0.91 (0.54-1.53)
COVID-19 hospitalization	15 / 4,492 (0.3%)	1,221 / 401,811 (0.3%)	0.78 (0.37-1.65)
Mechanical ventilation	3 / 4,492 (0.1%)	144 / 401,811 (0.1%)	0.51 (0.15-1.75)
COVID-19 death	1 / 4,492 (0.02%)	108 / 401,811 (0.03%)	0.74 (0.10-5.33)
Fenofibrate users vs. TZD users
SARS-CoV-2 positive	32 / 4,492 (0.7%)	110 / 9,045 (1.2%)	0.52 (0.32-0.86)
COVID-19 hospitalization	15 / 4,492 (0.3%)	43 / 9,045 (0.5%)	0.70 (0.39-1.26)
Mechanical ventilation	3 / 4,492 (0.1%)	6 / 9,045 (0.1%)	0.60 (0.13-2.71)
COVID-19 death	1 / 4,492 (0.02%)	5 / 9,045 (0.1%)	0.40 (0.05-3.45)
