# Supplementary material for: Efficacy and safety of metabolic interventions for the treatment of severe COVID-19: in vitro, observational, and non-randomized open-label interventional study
Source: eLife. 2023 Jan 27;12:e79946. doi: 10.7554/eLife.79946 (PMC9937660; doi:10.7554/eLife.79946)
Supplement: Supplementary file 4. — (Tab 1) Characteristics of patients compared in the patients in the interventional study 15 Participants who met the inclusion criteria were assigned to intervention with nanocrystallized fenofibrate (TriCor, AbbVie Inc, North Chicago, IL USA) at a dose of 145 mg (1 tablet) once per day. Standard care for severe-hospitalize COVID-19 patients was provided according to local practice: antiviral treatment, vitamin D3, low-dose glucocorticoids, convalescent plasma, and supportive care as well as antipyretic for symptoms of fever (products containing paracetamol, or non-steroidal anti-inflammatories such as aspirin and ibuprofen) and dextromethorphan for symptoms of cough. Standard chronic treatments were continued unless COVID-19, clinical status, or fenofibrate treatment was a counterindication for the treatment. Control patients were collected from the observational study’s database and filtered to patients that meet the inclusion criteria, were admitted with low immunoinflammatory stress (NLR <10 at admission), and were treated according to the standard care used in the interventional study. SBP, systolic blood pressure; DBP, diastolic blood pressure; COPD, chronic obstructive pulmonary disease; SpO2, oxygen saturation; ECMO, extracorporeal membrane oxygenation; IQR, interquartile range. Continuous variables were expressed as median [IQR] and were compared with a Mann-Whitney U test. Categorical variables were expressed as a count and percentage (%) and compared with a chi-squared test or Fisher’s exact test. The sample size is detailed in each display item. (Tab 2) Cox regression model of 28-days mortality in the treatment group versus control. Adjusted HR and p-values were calculated based using an unadjusted Cox regression model, a Cox regression model adjusting for age, gender, and pre-existing comorbidities (smoking, asthma, COPD, DM, hypertension, diabetes, coronary heart disease, obesity, dyslipidemia, cerebrovascular disease, chronic liver disease, and chroni [file elife-79946-supp4.xlsx]

## Sheet: Patient's Characteristics
Parameters	Fenofibrate	Control	p value
	(N = 15)	(N = 144)
Clinical Characteristics on Admission
Age, median (IQR)	64 (47-73)	60 (48.9-68.5)	0.8412
Female gender, n (%)	9 (60%)	58 (40.3%)	0.3547
Heart rate, median (IQR), bpm	85 (79-93)	88 (77-98)	0.667
SBP, median (IQR), mmHg	129 (118.5-136)	126 (116.8-143)	0.9483
DBP, median (IQR), mmHg	77 (70-82.5)	74 (68.8-81.3)	0.608
%SpO2, median (IQR)	91 (90-92)	93 (91-95)	0.0107
%FiO2, median (IQR)	29 (29-29)	29 (25-33)	0.2532
Lesions on chest CT, n (%)	14 (93.3%)	131 (91.0%)	1
Temperature (P.O), median (IQR)	37.1 (36.9-37.3)	37.1 (36.8-37.6)	0.7611
Smoking, n (%)	0 (0%)	5 (3.5%)	1
Comorbidities on Admission
Asthma, n (%)	1 (6.7%)	2 (1.4%)	0.268
COPD, n (%)	0 (0%)	6 (4.2%)	1
Hypertension, n (%)	8 (53.3%)	52 (36.1%)	0.4583
Diabetes, n (%)	6 (40%)	40 (27.8%)	0.5796
Chronic heart disease, n (%)	1 (6.7%)	28 (19.4%)	0.4737
Obesity, n (%)	7 (46.7%)	19 (13.2%)	0.0184
Dyslipidemia, n (%)	8 (53.3%)	37 (25.7%)	0.1776
Cerebrovascular disease, n (%)	0 (0%)	1 (0.7%)	1
Chronic liver disease, n (%)	2 (13.3%)	4 (2.8%)	0.116
Chronic kidney disease, n (%)	3 (20%)	0 (0%)	0.0012
Laboratory Examination on Admission
Platelets count, median (IQR)	190 (169.5-204.5)	189 (156-255)	0.8048
Neutrophil count, median (IQR)	3.8 (2.8-4.5)	3.7 (2.8-5.3)	0.6879
Lymphocyte count, median (IQR)	1 (0.8-1.8)	0.8 (0.7-1.1)	0.1303
C-reactive protein, median (IQR)	8.7 (5.1-11)	11.9 (5.8-15.5)	0.1652
Cardiac Troponin, median (IQR)	17 (14.5-18.5)	6 (3.5-16)	0.0209
Ferritin, median (IQR)	495.9 (286.2-683.4)	504 (220.1-1160.8)	0.9264
Creatinine, median (IQR)	73 (62.5-86)	80 (67-91)	0.3939
LDH, median (IQR)	517 (458-653)	347 (270-441)	<0.001
D-dimer, median (IQR)	0.7 (0.4-1.1)	0.8 (0.5-1.3)	0.4763
T.Bilirubin, median (IQR)	6.2 (5.6-8)	8.6 (6.6-11.6)	0.0123
Lactic Acid, median (IQR)	2 (1.3-2.2)	2 (1.7-2.4)	0.6784
Glucose, median (IQR)	6.5 (5.8-8.8)	6.1 (5.3-7.5)	0.2286
Statistical Outcomes
Follow-up days, median (IQR)	7 (5.5-7.5)	9.3 (6.8-14)	<0.001
ICU admission, n (%)	0 (0%)	24 (16.7%)	0.2249
Deaths, n (%)	0 (0%)	8 (5.6%)	1
Rehospitalization, n (%)	0 (0%)	25 (17.4%)	0.2285
Mechanically Ventilated/ECMO, n (%)	0 (0%)	11 (7.6%)	0.6014
High Flow Oxygen, n (%)	1 (6.7%)	36 (25%)	0.3147
Weaned-off Supplemental Oxygen by Day 7	14 (93.3%)	53 (39.3%)	0.0052

## Sheet: Cox regression model of 28-days
A
	Hazard Ratio [95%CI]	p value
Unadjusted	3.637 [2.067;6.398]	7.46e-06
Adjusted for age, gender, and pre-existing comorbidities	3.940 [2.223; 6.982]	2.63e-06
Adjusted for obesity, chronic kidney disease and SpO2	3.635 [1.938; 6.818]	5.78e-05
B
	Hazard Ratio [95%CI]	p value
Unadjusted	2.873 [1.661; 4.970]	0.000161
Adjusted for age, gender, and pre-existing comorbidities	3.296 [1.866; 5.822]	3.99e-05
Adjusted for obesity, chronic kidney disease and SpO2	4.517 [2.344; 8.706]	6.65e-06
C
	Hazard Ratio [95%CI]	p value
Unadjusted	0.262 [0.002; 2.444]	0.2868
Adjusted for age, gender, and pre-existing comorbidities	0.307 [0.002; 2.865]	0.3575
Adjusted for obesity, chronic kidney disease and SpO2	0.313 [0.077; 3.300]	0.4025

## Sheet: Post-acute incident diagnoses
Assessment of significant post-acute incident diagnoses in people who had been hospitalized with COVID-19 (long COVID) in patients registered in the VA database 27 vs. those treated with 145 mg fenofibrate in this study at 6 months after hospital discharge. Incident rate per 1000 at 6-months in hospitalized COVID-19 were ascertained from day 30 after hospital admission until 6 months or end of fo…
Diagnosis group	Diagnosis	Significane in Post-COVID	Incident rate per 1000 at 6-months in hospitalized COVID-19 (95% confidence interval)
Veteran Administration Database (Al-Aly, Z. et al, 2021)	Veteran Administration Database (Al-Aly, Z. et al, 2021)	p-value (Al-Aly, Z. et al, 2021)	Veteran Administration Database (Al-Aly, Z. et al, 2021)	145 mg TriCor® (Fenofibrate) (This Study)
			n = 13,654	n = 15
Diseases of the Blood and Blood Forming Organs and Certain Disorders Involving the Immune Mechanism	Coagulation and hemorrhagic disorders	1.59831e-37	35.7 (32.35, 39.39)	0 (0, 21.8)
Diseases of the Blood and Blood Forming Organs and Certain Disorders Involving the Immune Mechanism	Diseases of white blood cells	1.43534e-22	37.65 (34.17, 41.46)	0 (0, 21.8)
Diseases of the Blood and Blood Forming Organs and Certain Disorders Involving the Immune Mechanism	Aplastic anemia	2.89937e-21	97.98 (92.11, 104.19)	0 (0, 21.8)
Diseases of the Blood and Blood Forming Organs and Certain Disorders Involving the Immune Mechanism	Acute posthemorrhagic anemia	1.82e-13	16.87 (14.62, 19.46)	0 (0, 21.8)
Diseases of the Blood and Blood Forming Organs and Certain Disorders Involving the Immune Mechanism	Nutritional anemia	3.15e-10	57.53 (53.12, 62.3)	0 (0, 21.8)
Diseases of the Blood and Blood Forming Organs and Certain Disorders Involving the Immune Mechanism	Acute phlebitis; thrombophlebitis and thromboembolism	2.53032e-27	29.41 (26.4, 32.76)	0 (0, 21.8)
Diseases of the Circulatory System	Acute pulmonary embolism	3.66814e-78	28.14 (25.14, 31.51)	0 (0, 21.8)
Diseases of the Circulatory System	Acute phlebitis; thrombophlebitis and thromboembolism	2.53032e-27	29.41 (26.4, 32.76)	0 (0, 21.8)
Diseases of the Circulatory System	Hypotension	4.3901e-23	56.14 (51.84, 60.79)	0 (0, 21.8)
Diseases of the Circulatory System	Hypertension with complications and secondary hypertension	2.3e-16	94.45 (88.52, 100.76)	0 (0, 21.8)
Diseases of the Circulatory System	Cardiac dysrhythmias	2.9e-11	84.04 (78.57, 89.88)	0 (0, 21.8)
Diseases of the Circulatory System	Acute myocardial infarction	3.84e-08	23.33 (20.62, 26.39)	0 (0, 21.8)
Diseases of the Circulatory System	Cardiac arrest and ventricular fibrillation	2.35e-06	7.48 (6, 9.31)	0 (0, 21.8)
Diseases of the Circulatory System	Chronic phlebitis; thrombophlebitis and thromboembolism	6.45e-06	10.6 (8.78, 12.79)	0 (0, 21.8)
Diseases of the Circulatory System	Pericarditis and pericardial disease	0.000734797	6.32 (5.01, 7.97)	0 (0, 21.8)
Diseases of the Genitourinary System	Acute and unspecified renal failure	4.08096e-86	93.1 (87.47, 99.07)	0 (0, 21.8)
Diseases of the Genitourinary System	Urinary tract infections	2.08751e-22	62.02 (57.45, 66.95)	0 (0, 21.8)
Diseases of the Genitourinary System	Hyperplasia of prostate	1.88e-11	79.34 (73.91, 85.15)	0 (0, 21.8)
Diseases of the Genitourinary System	Chronic kidney disease	6.84e-08	57.91 (53.24, 62.97)	0 (0, 21.8)
Diseases of the Genitourinary System	Other specified and unspecified diseases of kidney and ureters	0.000667726	34.82 (31.42, 38.57)	0 (0, 21.8)
Diseases of the Musculoskeletal System and Connective Tissue	Muscle disorders	1.96267e-40	88.84 (83.37, 94.64)	0 (0, 21.8)
Diseases of the Nervous System	Myopathies	1.10769e-51	8.66 (6.99, 10.71)	0 (0, 21.8)
Diseases of the Nervous System	Other specified nervous system disorders	7.1e-17	78.63 (73.26, 84.37)	0 (0, 21.8)
Diseases of the Nervous System	Neurocognitive disorders	3.13e-13	54.66 (50.33, 59.35)	0 (0, 21.8)
Diseases of the Nervous System	Sleep wake disorders	3.3e-06	121.28 (113.91, 129.09)	0 (0, 21.8)
Symptoms, Signs and Abnormal Clinical and Laboratory Findings, Not Elsewhere Classified	Malaise and fatigue	6.14001e-66	116.41 (110.05, 123.1)	6.67 (0.17, 31.95)
Symptoms, Signs and Abnormal Clinical and Laboratory Findings, Not Elsewhere Classified	Respiratory signs and symptoms	1.6375e-59	165.97 (157.56, 174.79)	6.67 (0.17, 31.95)
Symptoms, Signs and Abnormal Clinical and Laboratory Findings, Not Elsewhere Classified	Dysphagia	3.11361e-30	70.46 (65.66, 75.6)	0 (0, 21.8)
Symptoms, Signs and Abnormal Clinical and Laboratory Findings, Not Elsewhere Classified	Circulatory signs and symptoms	8.06969e-24	75.45 (70.34, 80.9)	0 (0, 21.8)
Symptoms, Signs and Abnormal Clinical and Laboratory Findings, Not Elsewhere Classified	Fever	3.49e-16	22.14 (19.43, 25.23)	0 (0, 21.8)
Symptoms, Signs and Abnormal Clinical and Laboratory Findings, Not Elsewhere Classified	Nervous system signs and symptoms	5.02e-12	143.35 (135.87, 151.2)	0 (0, 21.8)
Diseases of the Respiratory System	Pneumonia (except that caused by tuberculosis)	0	163.51 (155.93, 171.43)	0 (0, 21.8)
Diseases of the Respiratory System	Respiratory failure; insufficiency; arrest	0	118.64 (112.3, 125.3)	0 (0, 21.8)
Diseases of the Respiratory System	Postprocedural or postoperative respiratory system complication	1.65592e-56	13.51 (11.41, 15.99)	6.67 (0.17, 31.95)
Diseases of the Respiratory System	Other specified and unspecified lower respiratory disease	4.28885e-44	49.86 (45.75, 54.32)	0 (0, 21.8)
Endocrine, Nutritional and Metabolic Diseases	Fluid and electrolyte disorders	2.99181e-76	125.25 (118.58, 132.26)	0 (0, 21.8)
Endocrine, Nutritional and Metabolic Diseases	Malnutrition	1.09388e-37	45.29 (41.47, 49.45)	0 (0, 21.8)
Endocrine, Nutritional and Metabolic Diseases	Other specified and unspecified nutritional and metabolic disorders	2.83625e-31	64.04 (59.39, 69.04)	0 (0, 21.8)
Endocrine, Nutritional and Metabolic Diseases	Disorders of lipid metabolism	9.41e-15	185.81 (175.1, 197.09)	0 (0, 21.8)
Endocrine, Nutritional and Metabolic Diseases	Diabetes mellitus, Type 2	2.56e-09	59.98 (54.29, 66.24)	0 (0, 21.8)
Endocrine, Nutritional and Metabolic Diseases	Obesity	7.17e-08	56.71 (52.03, 61.8)	0 (0, 21.8)
Endocrine, Nutritional and Metabolic Diseases	Diabetes mellitus with complication	3.35e-05	65.22 (59.85, 71.06)	0 (0, 21.8)
Endocrine, Nutritional and Metabolic Diseases	Other specified and unspecified endocrine disorders	0.00139621	20.24 (17.7, 23.14)	0 (0, 21.8)
